# Supplementary material for: Stilbenoids remodel the DNA methylation patterns in breast cancer cells and inhibit oncogenic NOTCH signaling through epigenetic regulation of MAML2 transcriptional activity
Source: PubMed Central journal article supplement — Carcinogenesis. 2016 Apr 28;37(7):656–68. doi: 10.1093/carcin/bgw048 (PMC4936385; doi:10.1093/carcin/bgw048), 2016-04-28

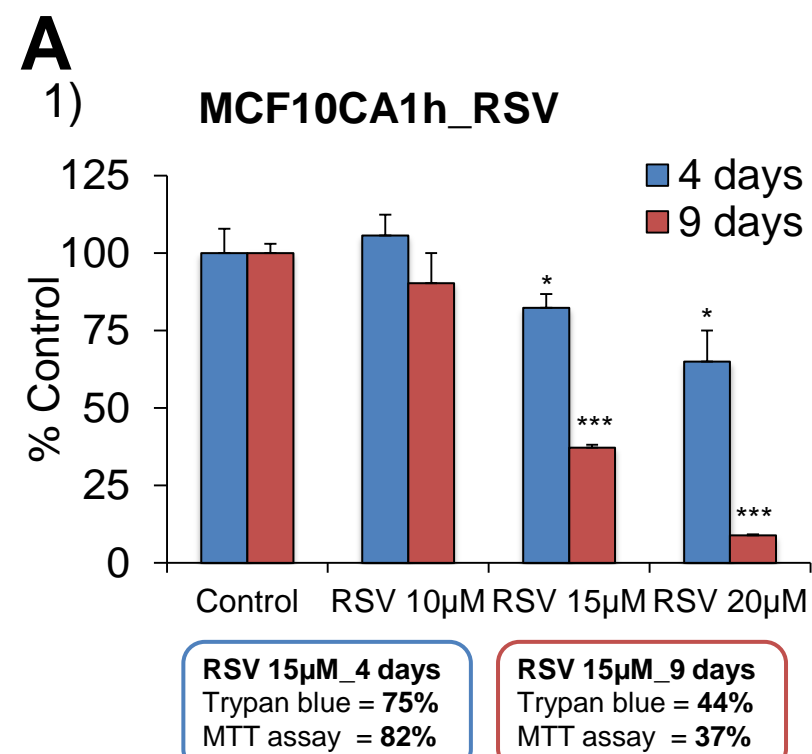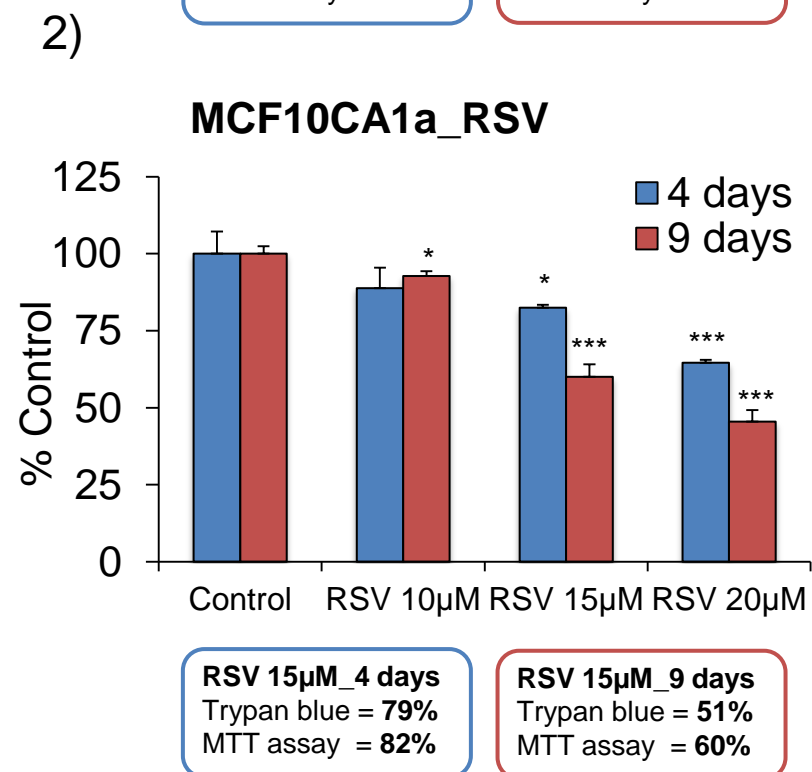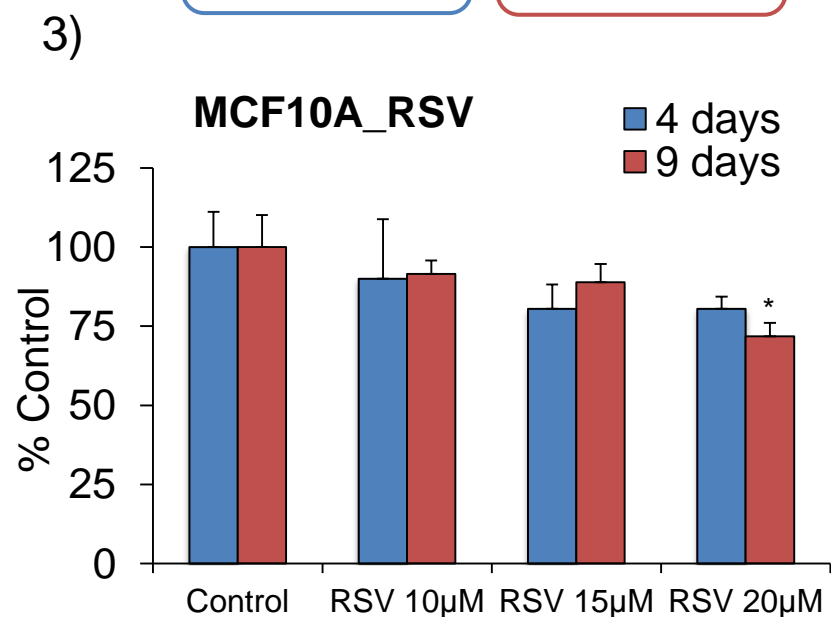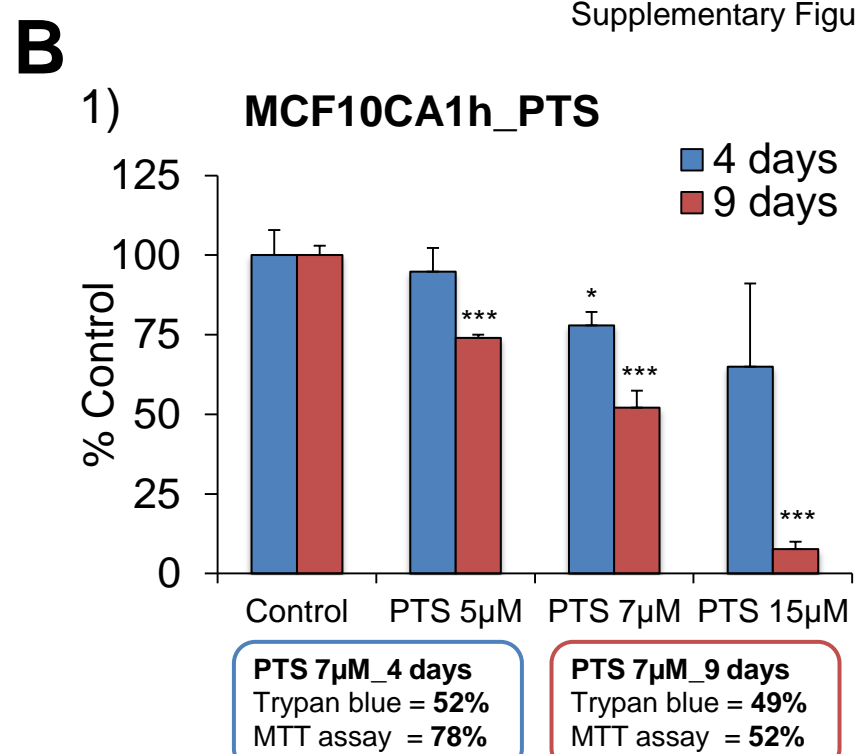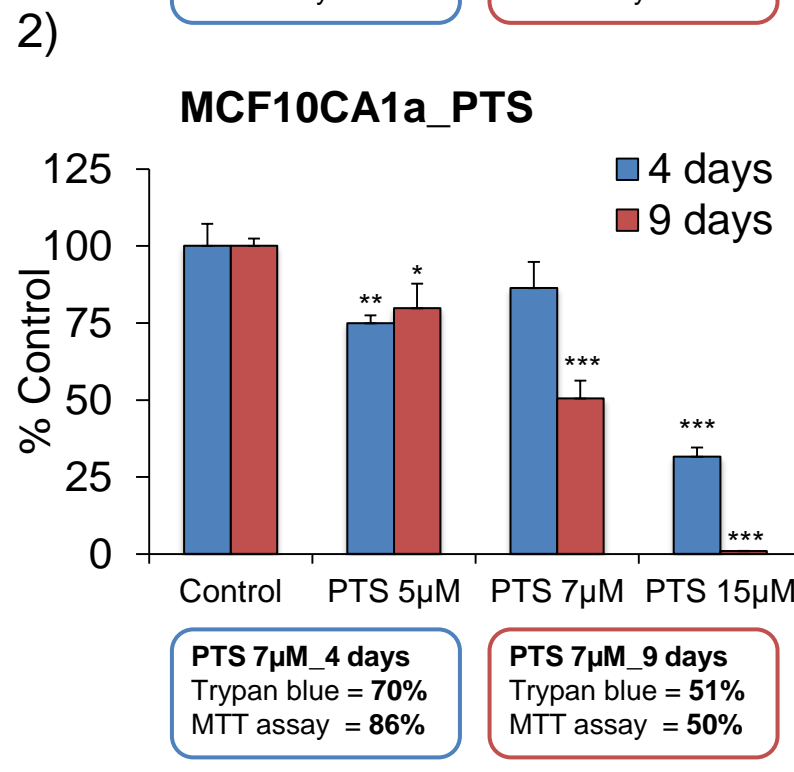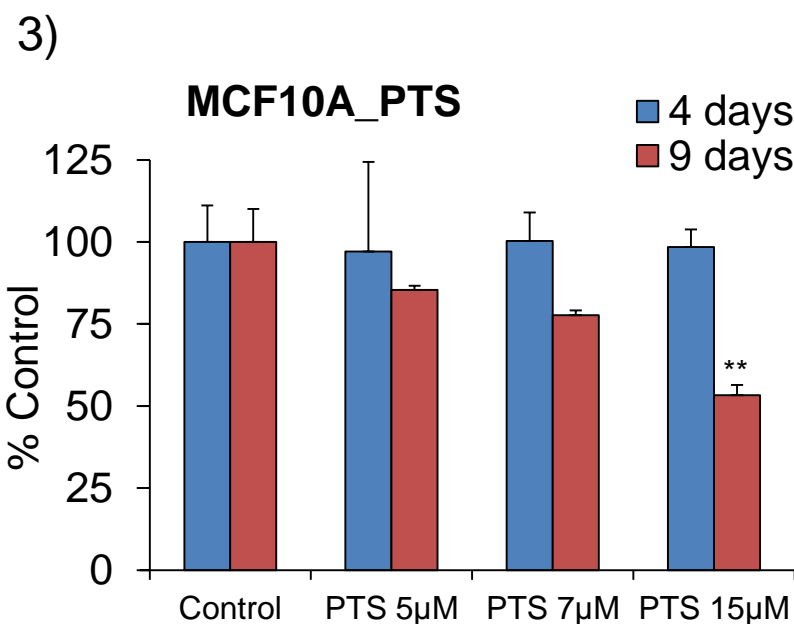

★ CpG site hypermethylated in cancer vs. normal

★ CpG site hypomethylated in cancer vs. normal

▲ CpG site affected by RSV

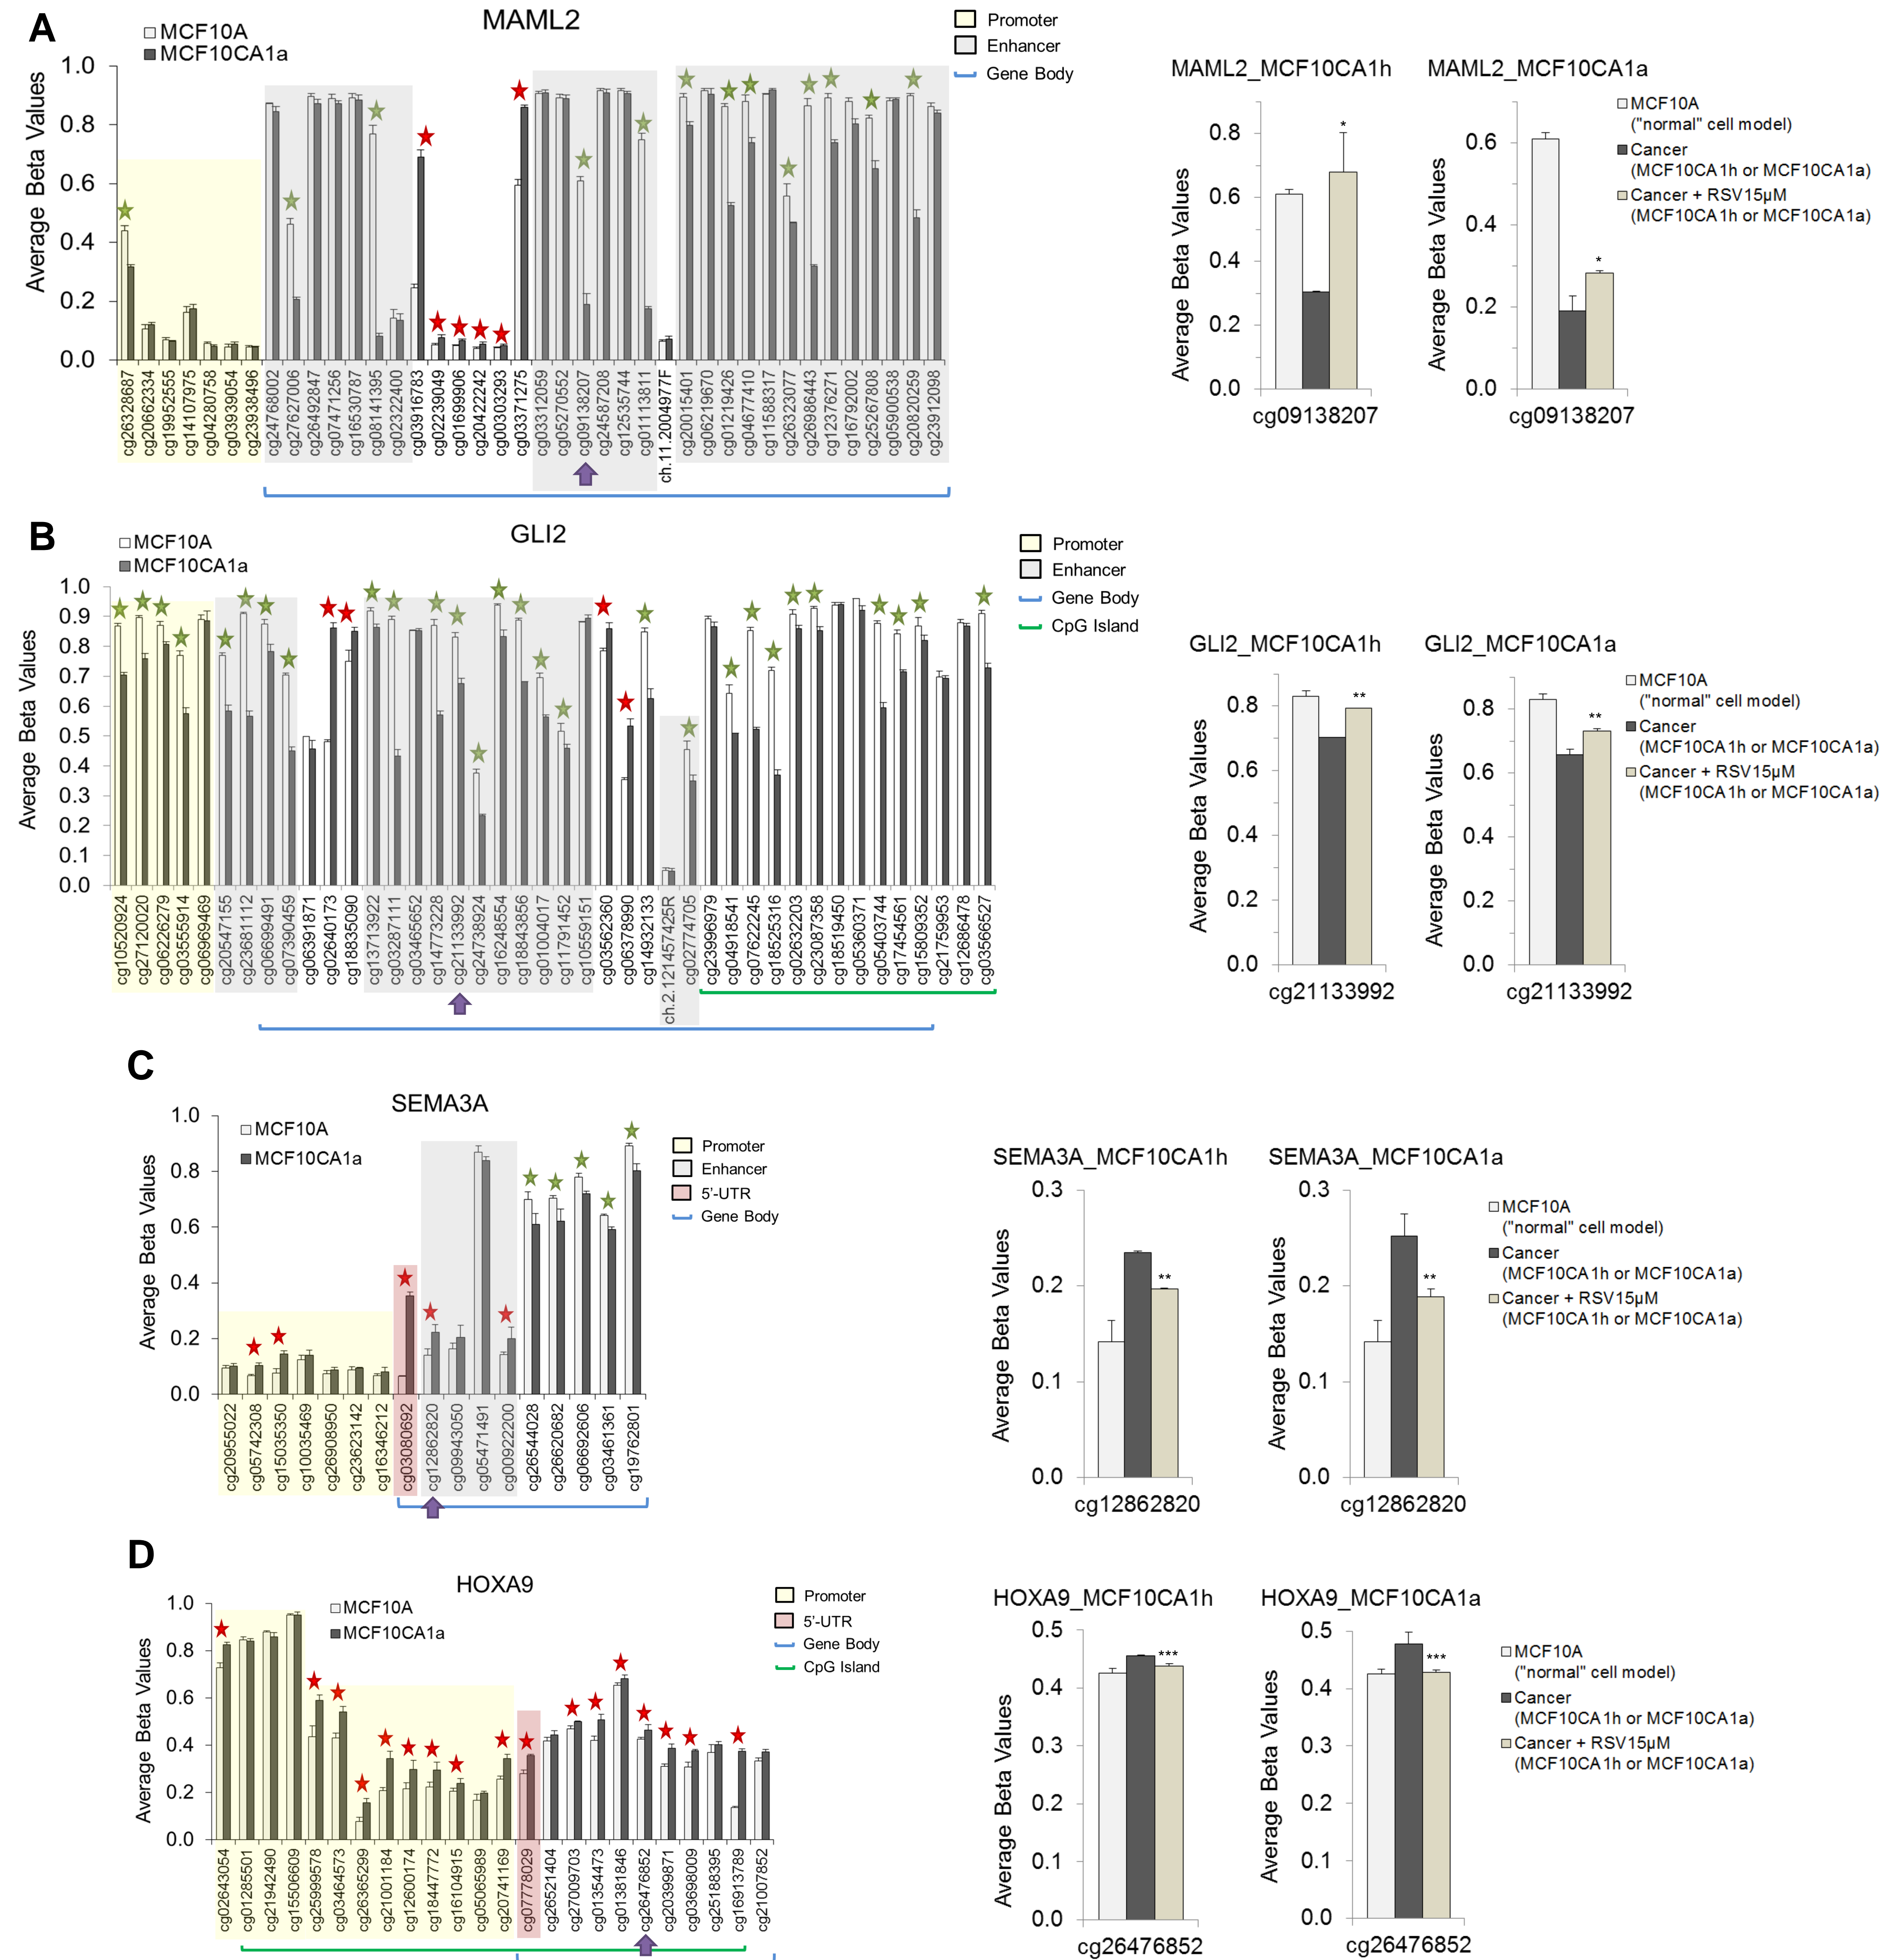

**MOBP**

cg07405330 (Body, S\_Shelf, Enhancer)

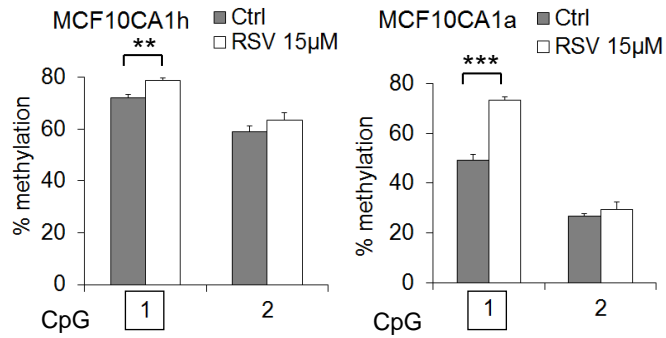**HCRT2**

cg00293660 (Body)

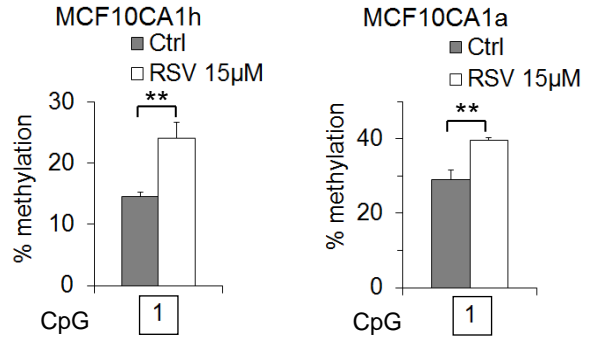**FGF7**

cg13597554 (Body, Enhancer)

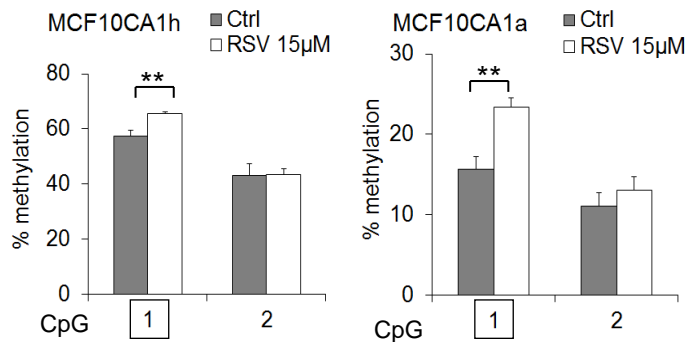**RNF150**

cg06763776 (Body, Enhancer)

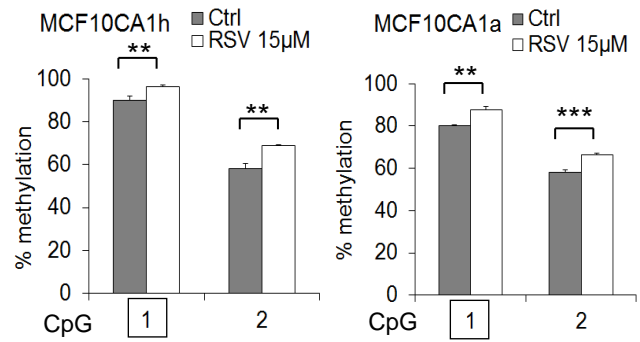**JMJD1C**

cg24409808 (Body, Enhancer)

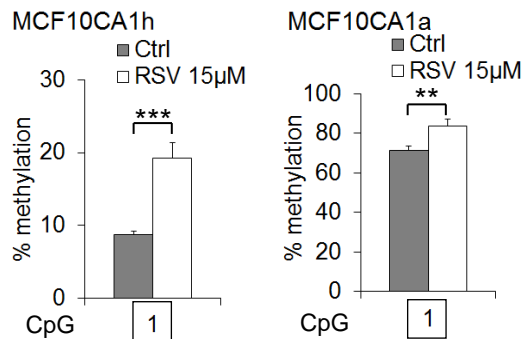**PRKG1**

cg05396900 (TSS1500, N\_Shore)

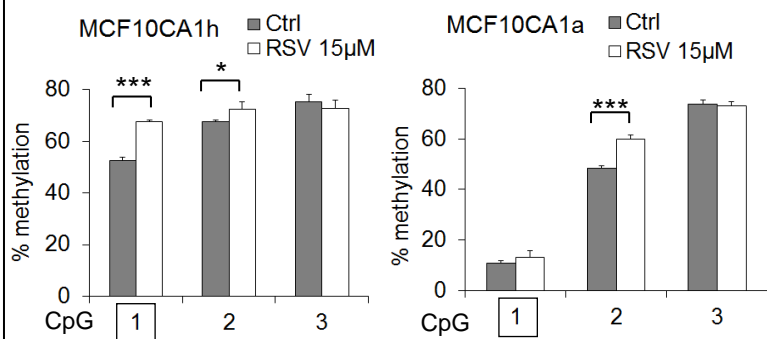**SH3PXD2B**

cg19032705\_Neighboring CpGs (Body)

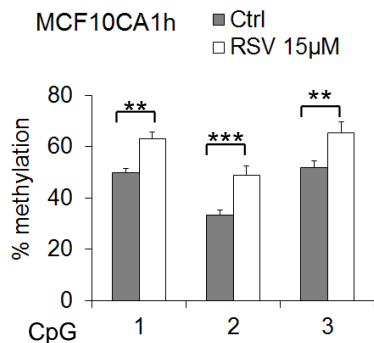**NDUFS6**

cg19687193 (Body)

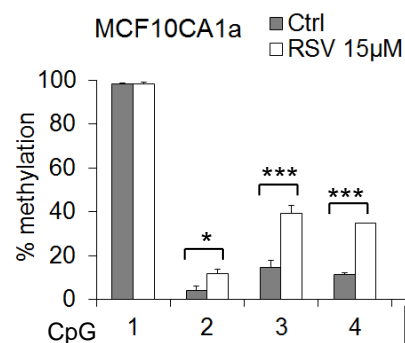

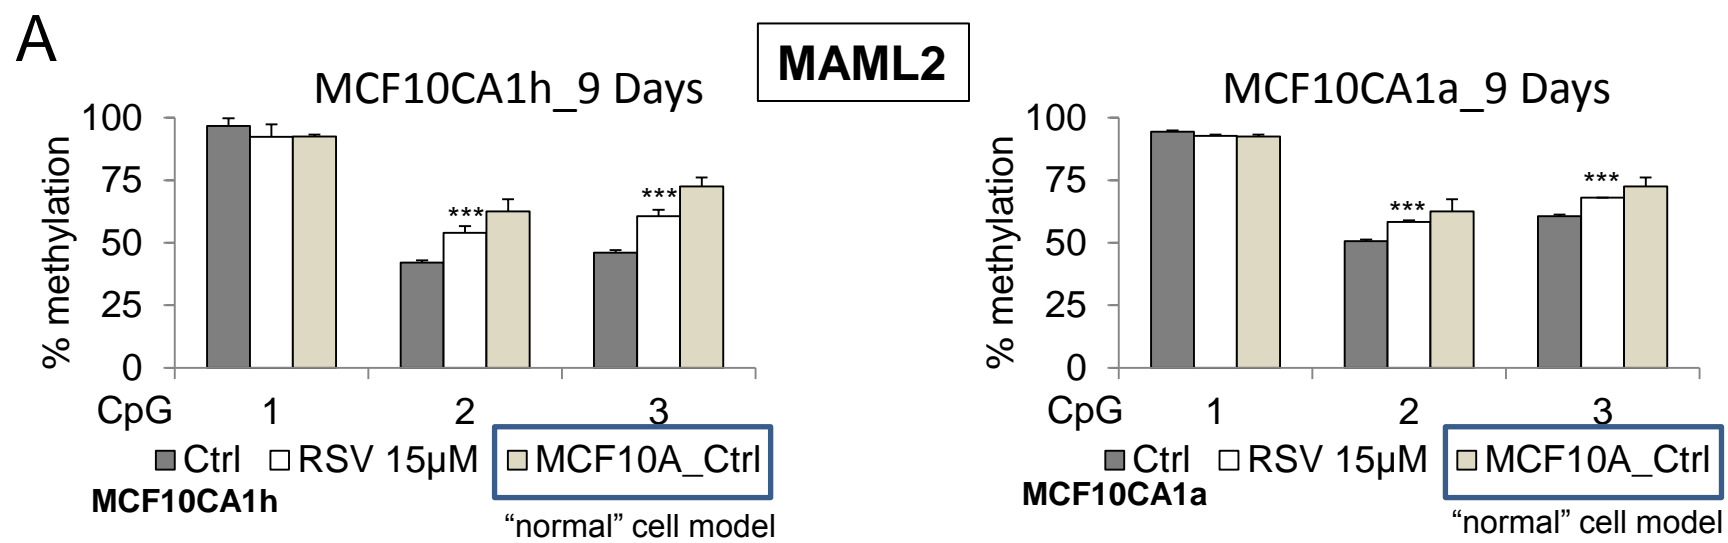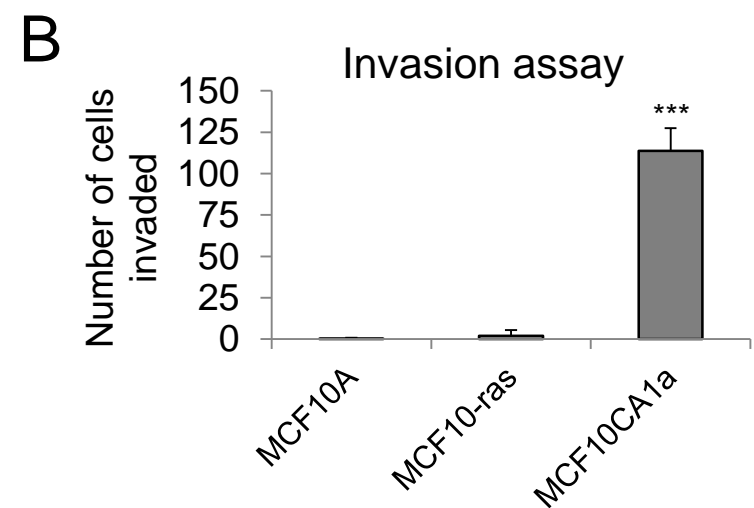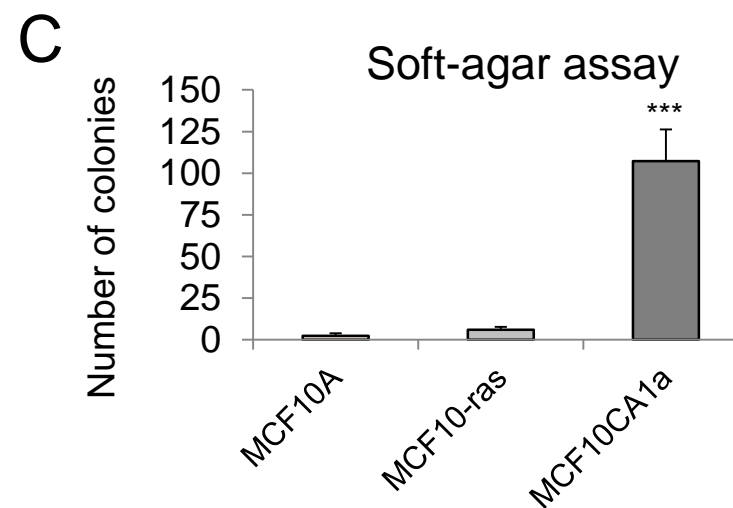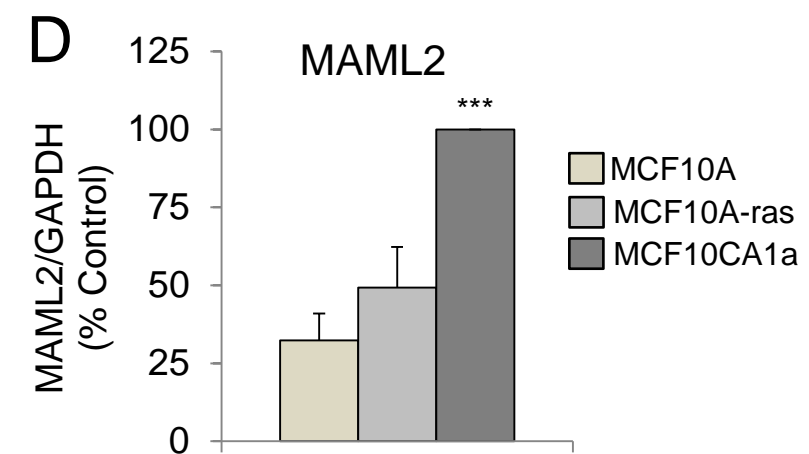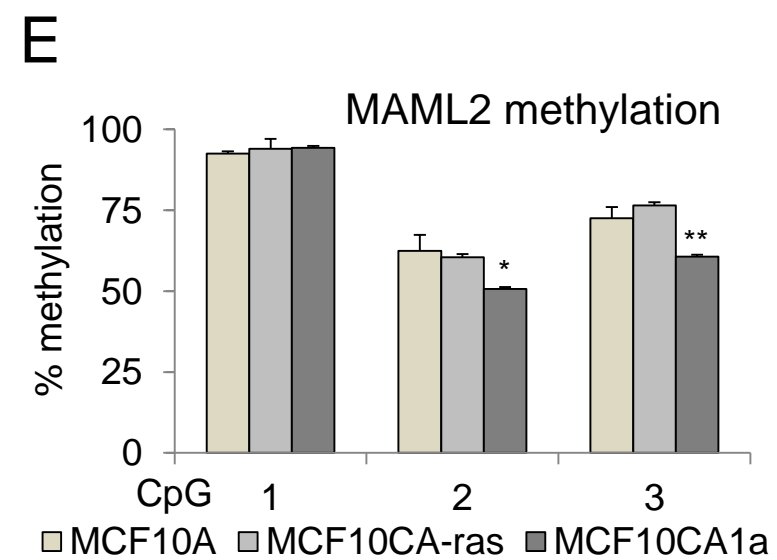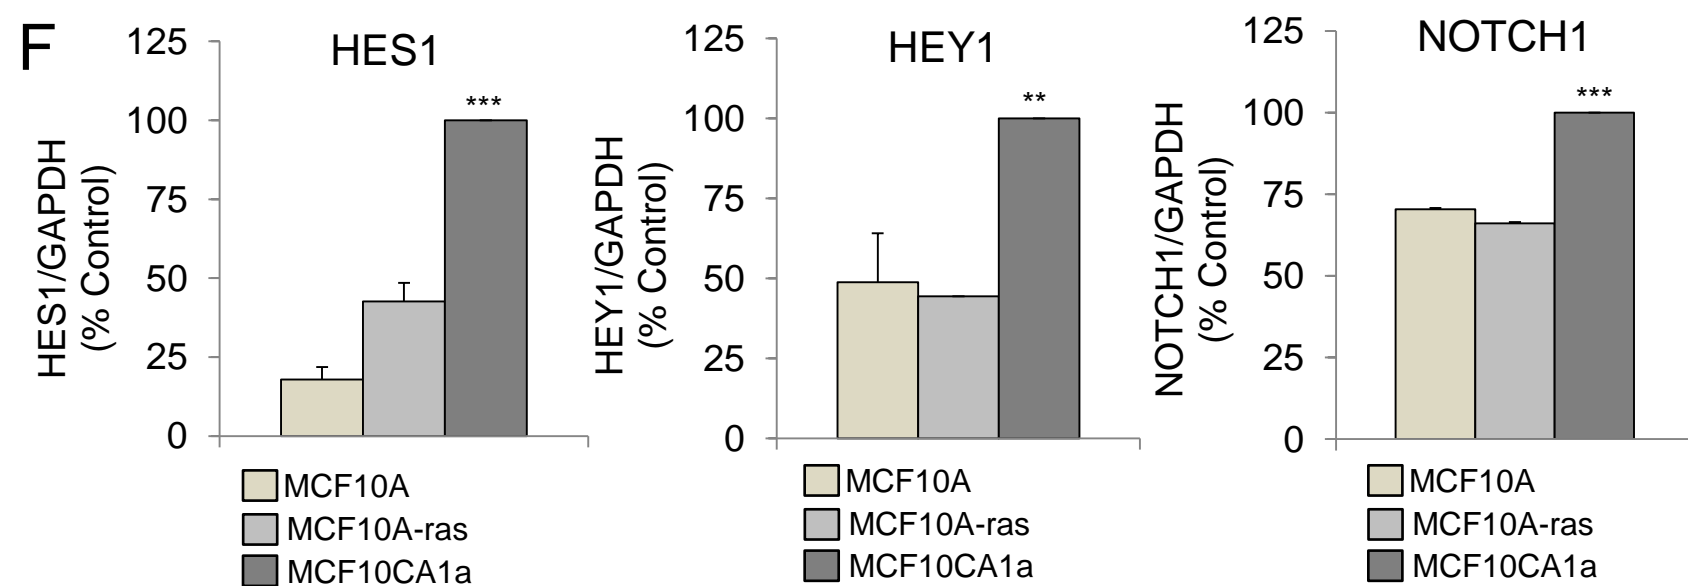

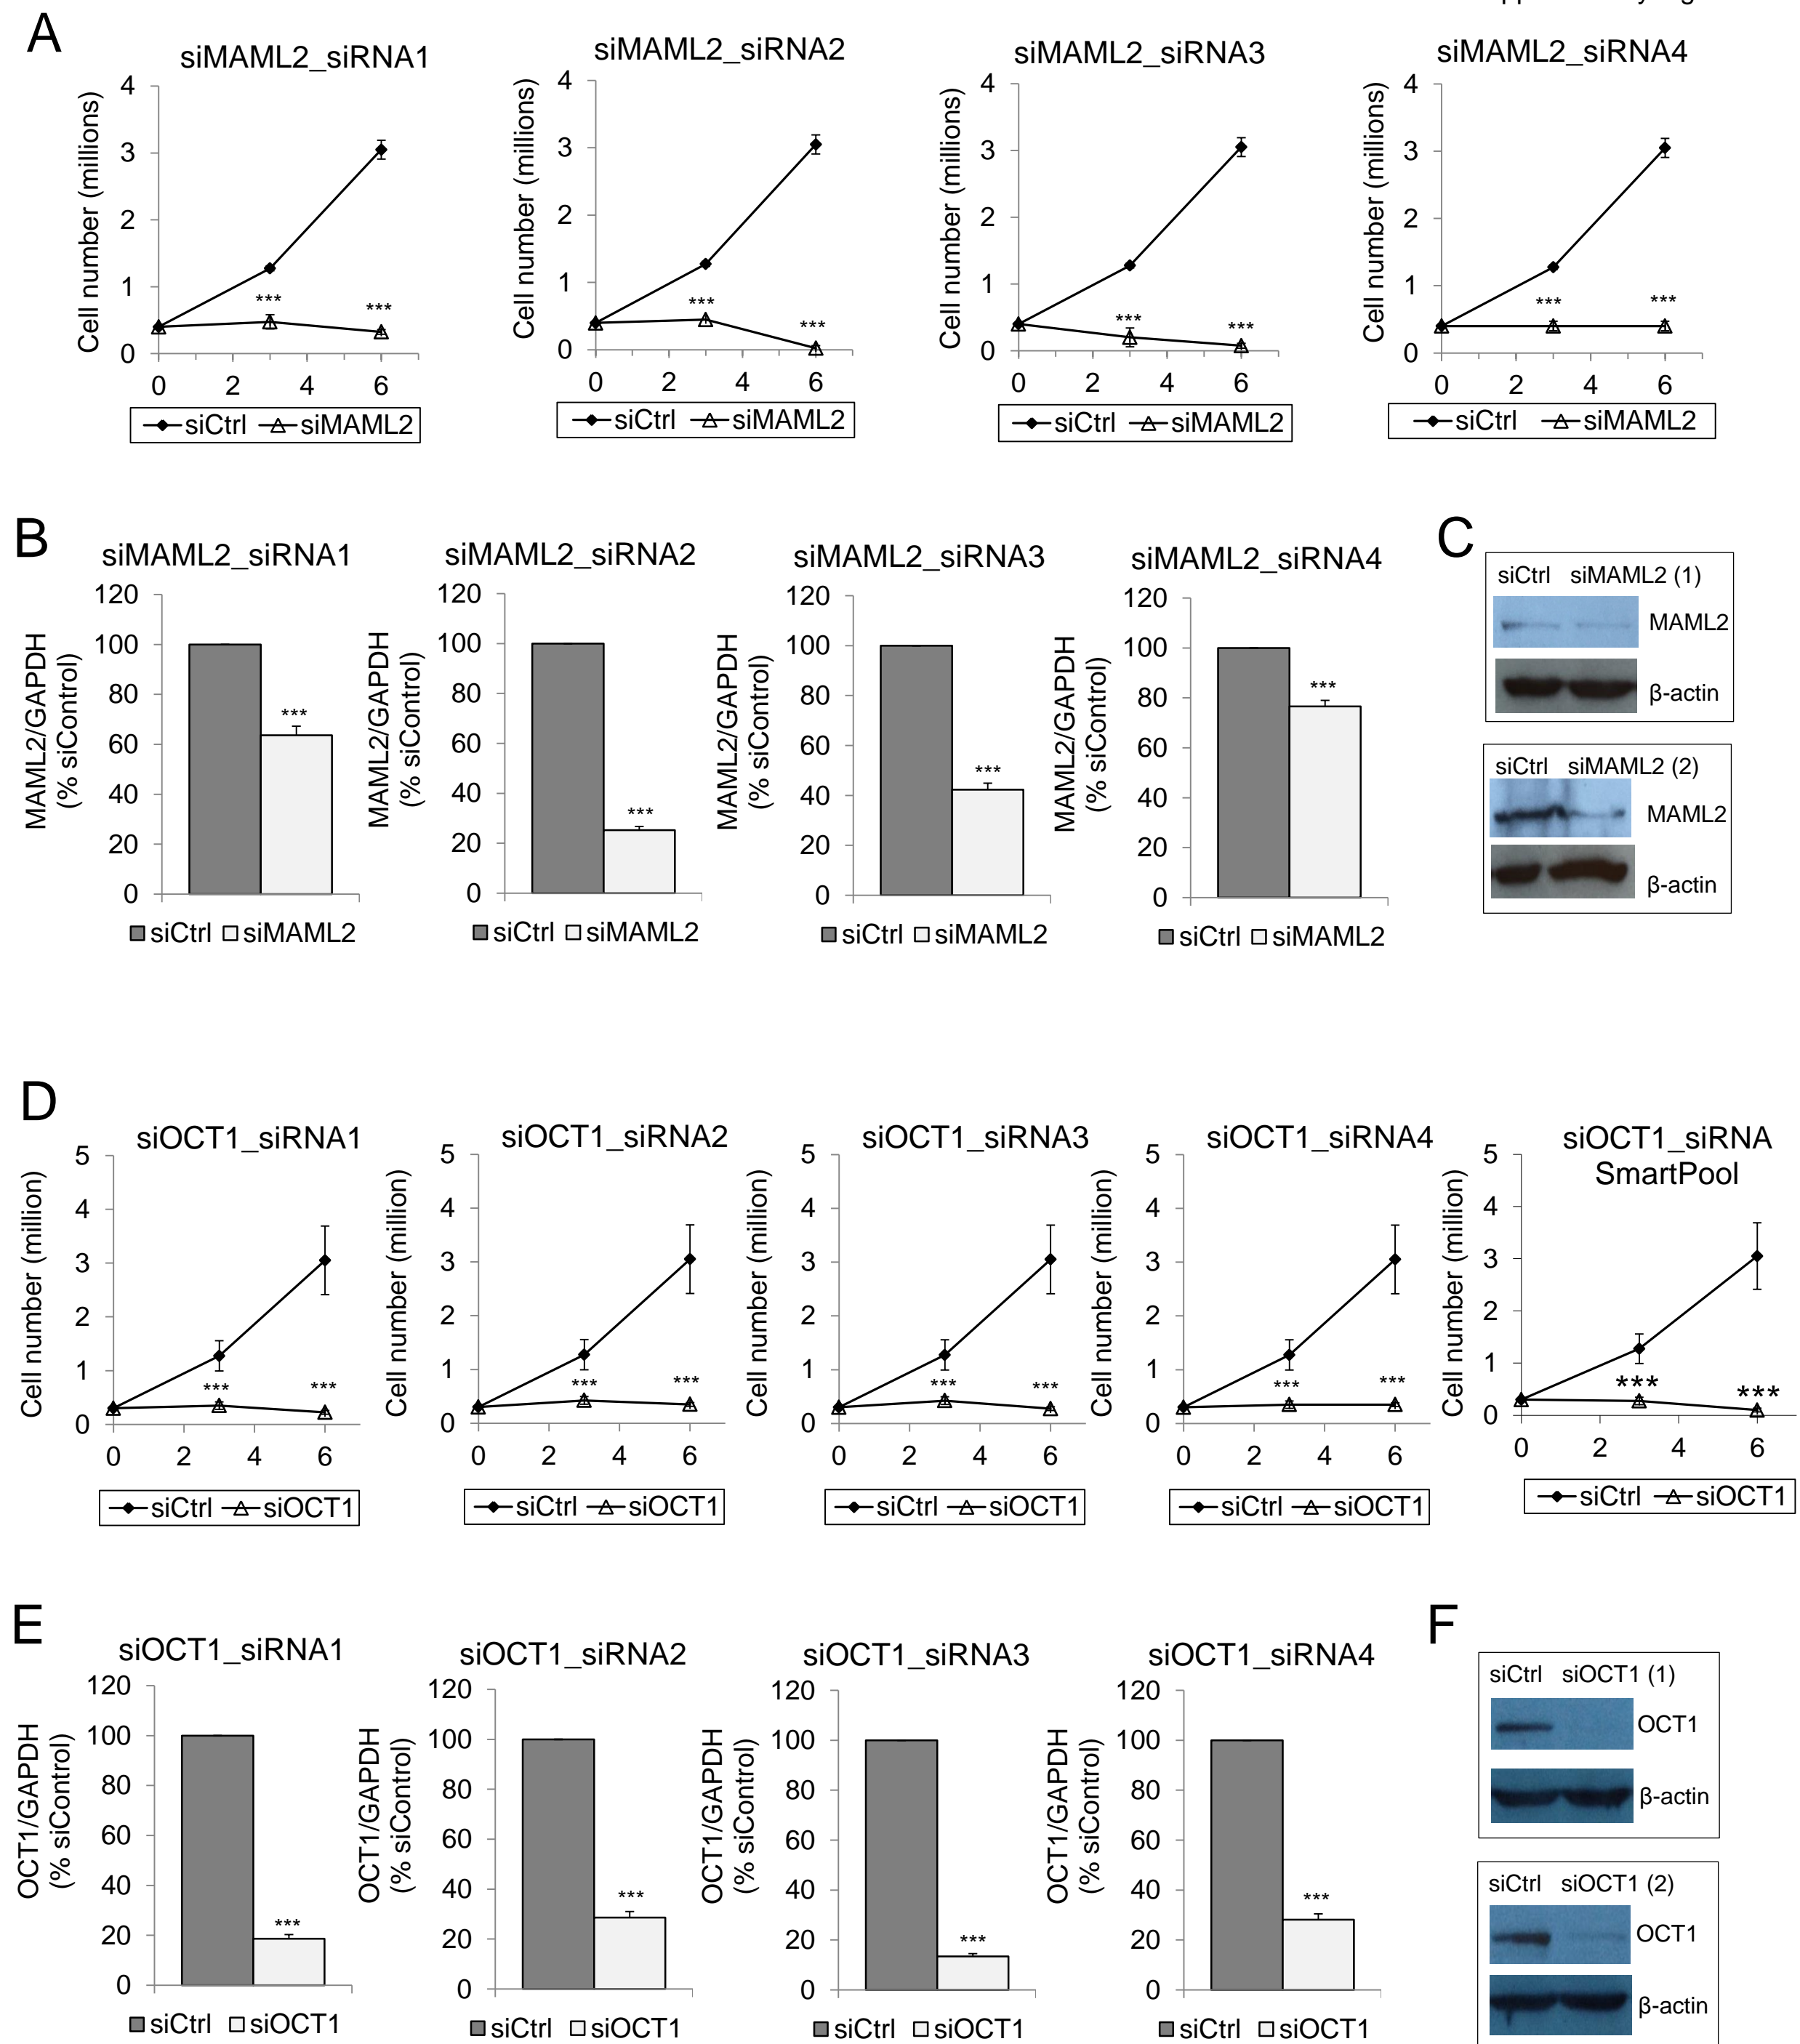

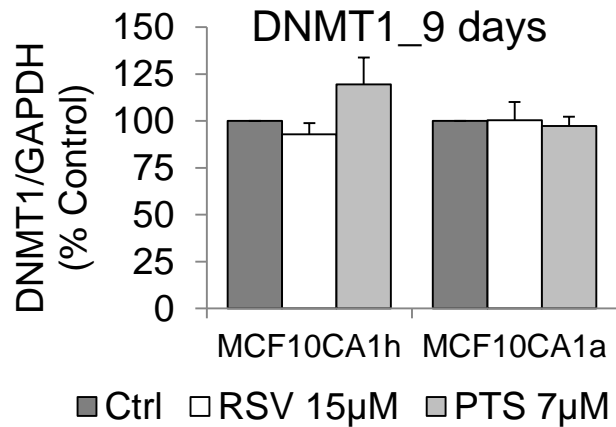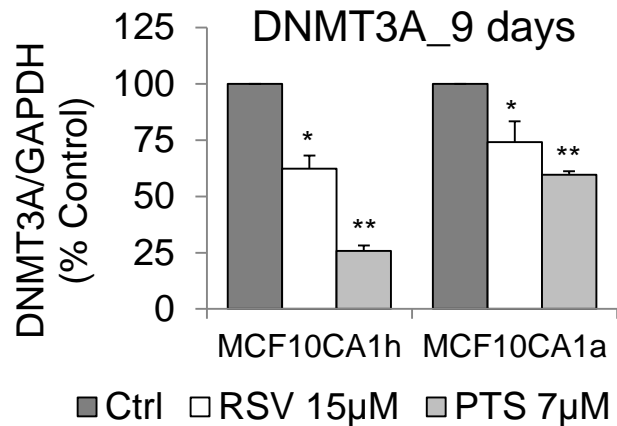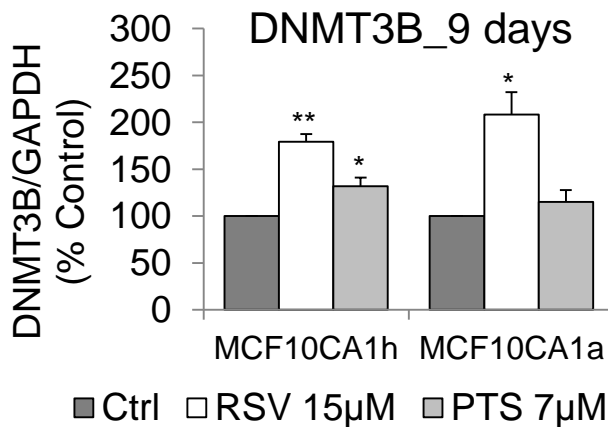

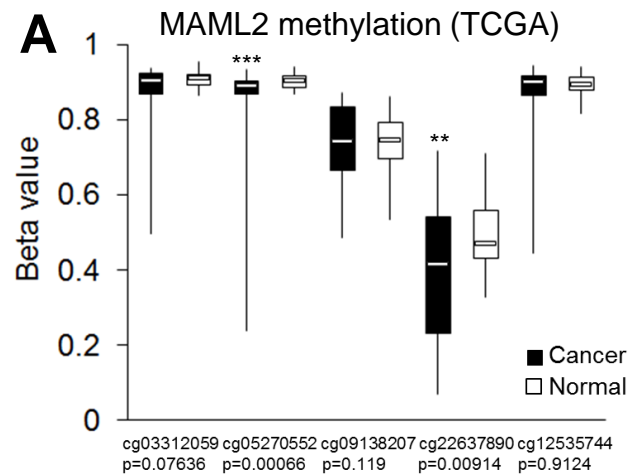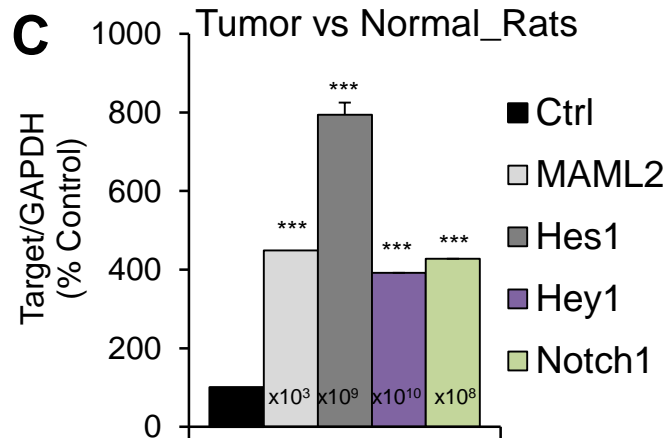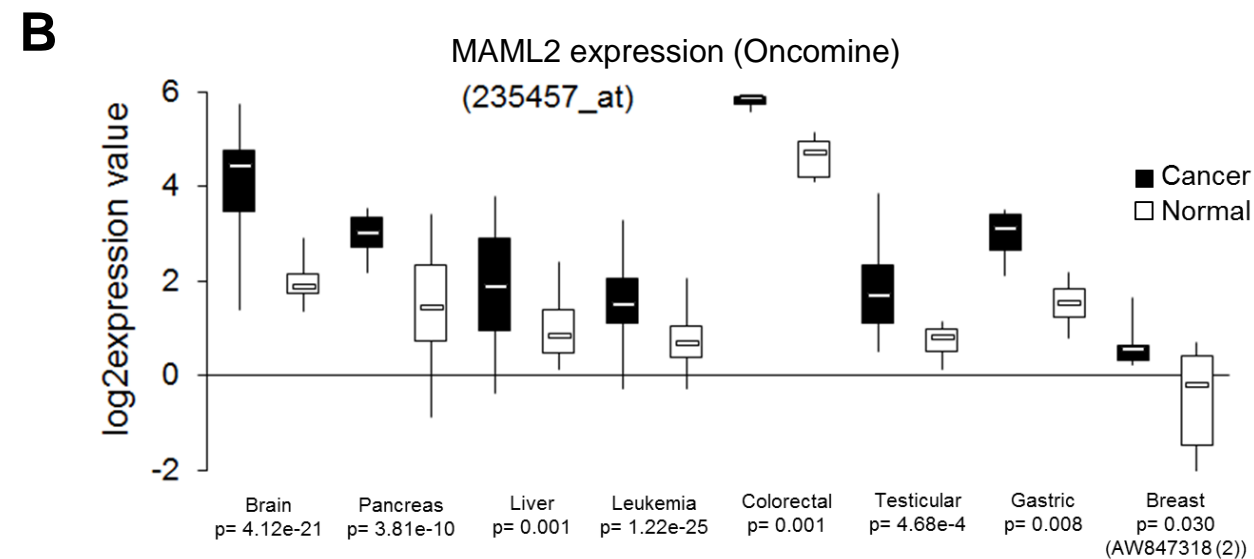

Supplement: supp_bgw048_Supplementary_Figures.pdf [file supp_bgw048_Supplementary_Figures.pdf]
