# Supplementary material for: Stilbenoids remodel the DNA methylation patterns in breast cancer cells and inhibit oncogenic NOTCH signaling through epigenetic regulation of MAML2 transcriptional activity
Source: PubMed Central journal article supplement — Carcinogenesis. 2016 Apr 28;37(7):656–68. doi: 10.1093/carcin/bgw048 (PMC4936385; doi:10.1093/carcin/bgw048), 2016-04-28
Supplement: supp_bgw048_Supplementary_Table_S1.pdf [file supp_bgw048_Supplementary_Table_S1.pdf]

**Supplementary Table S1A.** Primer sequences used in methylation analysis by pyrosequencing.

| Gene                                | Primer sequences for pyrosequencing                                                                                    | Annealing temperature [°C] | Amplicon length [bp] |
|-------------------------------------|------------------------------------------------------------------------------------------------------------------------|----------------------------|----------------------|
| MAML2 (Assay 3, three CpG sites)    | FW 5'-GGGGTATTTTTGAGTTTTGAGTTAGA-3'<br>RVBio 5'-AACATCCAAATATCAATATTATTATCAACC-3'<br>Seq 5'-AGTTTTGAGTTAGAAATT-3'      | 52                         | 270                  |
| MOBP (Assay 1, two CpG sites)       | FW 5'-GTGTTGTTTTGGAGTGTGATAG-3'<br>RVBio 5'-CCAAACTACACTCAACAACCTATACAC-3'<br>Seq 5'-ATTTGGTTTAGATTATATGGTTAA-3'       | 59                         | 229                  |
| HCRTR2 (Assay 1, one CpG site)      | FW 5'-GTGTAAAAAGATGTGGGTGATTAAG-3'<br>RVBio 5'-CTTCACAAACCTTTAAAACTAAC-3'<br>Seq 5'-TGTAGATATTAAGATTATGGAATTT-3'       | 54                         | 171                  |
| FGF7 (Assay 1, two CpG sites)       | FW 5'-GTTTATTTTATTTGATGAGGGAATTGAG-3'<br>RVBio 5'-AATCCAACCACCACTACCA-3'<br>Seq 5'-GATGAGGGAATTGAGT-3'                 | 59                         | 88                   |
| RNF150 (Assay 1, two CpG sites)     | FW 5'-AGAGTTTGGGTAAATGATGTGG-3'<br>RVBio 5'-CCCCTACAACCTCCTCTACACTAT-3'<br>Seq 5'-TTTGTGAGTTGTTAATATGT-3'              | 56                         | 287                  |
| JMJD1C (Assay 1, one CpG site)      | FW 5'-TTGGTAGATTAGTGAATGTTAAATAATGT-3'<br>RVBio 5'-AAAAATACAAAATTAACCAACCTACT-3'<br>Seq 5'-TGTTGTTTTATATGATTATATATT-3' | 56                         | 336                  |
| PRKG1 (Assay 2, three CpG sites)    | FW 5'-GGTAATTGTTGTTATTTAAGGATTAAGTG-3'<br>RVBio 5'-AACTACCCTTCCCTCCCTAAA-3'<br>Seq 5'-ATTTTTTTTTTTGGTATTATATAG-3'      | 54                         | 238                  |
| SH3PXD2B (Assay 2, three CpG sites) | FW 5'-TGGGATATATTTATTGTAGAAATTTAGTT-3'<br>RVBio 5'-CAAAAAAAAAAACACATACTCCCTTTTA-3'<br>Seq 5'-GTAATTTATTAGTTTTGAGTGG-3' | 54                         | 245                  |
| NDUFS6 (Assay 1, five CpG sites)    | FW 5'-AGAATGGAGTTTTGAGTTTGAATTTAGA-3'<br>RVBio 5'-ACCTCCCTACAAAAAACTAC-3'<br>Seq 5'-ATGGGAGGTTAGGGTTAT-3'              | 54                         | 287                  |

**Supplementary Table S1B.** Primer sequences used in expression analysis (QPCR).

| Gene   | Primer sequences for QPCR                                       | Annealing temperature [°C] | Amplicon length [bp] |
|--------|-----------------------------------------------------------------|----------------------------|----------------------|
| MAML2  | FW 5'-GTGGCAGTGGTGGGATAAA-3'<br>RV 5'-TTGCTGTTGGCAGGAGATAG-3'   | 59                         | 136                  |
| NOTCH1 | FW 5'-AATGGCGGGAAGTGTGA-3'<br>RV 5'-CATGTCCCAGGCTTCTT-3'        | 59                         | 125                  |
| HES1   | FW 5'-AGGCGGACATTCTGGAAAT-3'<br>RV 5'-CAGCACACTTGGGTCTGT-3'     | 59                         | 92                   |
| HEY1   | FW 5'-AGACCATCGAGGTGGAGAA-3'<br>RV 5'-AATCTGGGAAGATGTAGTTGGG-3' | 59                         | 92                   |
| GAPDH  | FW 5'-TGCACCACCACTGCTTA-3'<br>RV 5'-AGAGCAGGGATGATGTTTC-3'      | 59                         | 177                  |

**Supplementary Table S1C.** Primer sequences used in quantitative ChIP analysis (QChIP).

| Gene  | Primer sequences for QPCR                                           | Annealing temperature [°C] | Amplicon length [bp] |
|-------|---------------------------------------------------------------------|----------------------------|----------------------|
| MAML2 | FW 5'-TCTCTGAGCCAGAAATCATTCG-3'<br>RV 5'-CGCATTCATGGTGCTTTCTAAAT-3' | 59                         | 95                   |
