# Supplementary material for: Stilbenoids remodel the DNA methylation patterns in breast cancer cells and inhibit oncogenic NOTCH signaling through epigenetic regulation of MAML2 transcriptional activity
Source: PubMed Central journal article supplement — Carcinogenesis. 2016 Apr 28;37(7):656–68. doi: 10.1093/carcin/bgw048 (PMC4936385; doi:10.1093/carcin/bgw048), 2016-04-28
Supplement: supp_bgw048_Supplementary_Table_S2.pdf [file supp_bgw048_Supplementary_Table_S2.pdf]

| Genes Hypermethylated in MCF10CA1h in response to RSV | Genes Hypermethylated in MCF10CA1a in response to RSV | Common Hypermethylated Genes in MCF10CA1h and MCF10CA1a |
|-------------------------------------------------------|-------------------------------------------------------|---------------------------------------------------------|
| 42074                                                 |                                                       | 1-Mar A2BP1;A2BP1                                       |
| A1CF;A1CF;A1CF                                        |                                                       | 11-Mar A2BP1;A2BP1;A2BP1                                |
| A2BP1;A2BP1                                           |                                                       | 3-Mar ABCB1                                             |
| A2BP1;A2BP1;A2BP1                                     |                                                       | 4-Mar ABLIM2;ABLIM2;ABLIM2;ABLIM2;ABLIM2;ABLIM2;ABLIM2  |
| A2BP1;A2BP1;A2BP1;A2BP1;A2BP1;A2BP1                   | A2BP1;A2BP1                                           | ABR;ABR                                                 |
| A2M                                                   | A2BP1;A2BP1;A2BP1                                     | ACAN;ACAN                                               |
| A4GNT                                                 | A2LD1                                                 | ACCN1                                                   |
| ABCA3                                                 | A2ML1                                                 | ACE;ACE                                                 |
| ABCB1                                                 | A4GNT;A4GNT                                           | ACOT11;FAM151A                                          |
| ABCB4;ABCB4;ABCB4                                     | AADAC                                                 | ACTL8                                                   |
| ABLIM2;ABLIM2;ABLIM2;ABLIM2;ABLIM2;ABLIM2;ABLIM2      | AASS                                                  | ADAMTS16                                                |
| ABP1                                                  | ABCA1                                                 | ADARB2                                                  |
| ABR;ABR                                               | ABCA6                                                 | ADPRHL1;ADPRHL1                                         |
| ACAN;ACAN                                             | ABCB1                                                 | AFF3;AFF3                                               |
| ACBD6                                                 | ABLIM1;ABLIM1;ABLIM1                                  | AGBL4                                                   |
| ACCN1                                                 | ABLIM2;ABLIM2;ABLIM2;ABLIM2;ABLIM2;ABLIM2;ABLIM2      | AGTR1;AGTR1;AGTR1;AGTR1                                 |
| ACCSL                                                 | ABR;ABR                                               | ALX4                                                    |
| ACE;ACE                                               | ACADS                                                 | AMPH;AMPH                                               |
| ACOT11;FAM151A                                        | ACAN;ACAN                                             | ANK1;ANK1;ANK1;ANK1;ANK1                                |
| ACRC;BCYRN1                                           | ACCN1                                                 | APOL4;APOL4;APOL4;APOL4                                 |
| ACTC1                                                 | ACCN4;ACCN4;ACCN4;ACCN4                               | ARHGAP6;ARHGAP6                                         |
| ACTL8                                                 | ACE;ACE                                               | ARHGAP6;ARHGAP6;ARHGAP6                                 |
| ACTL9                                                 | ACOT11;FAM151A                                        | ARHGEF16                                                |
| ACTN2                                                 | ACOX3;ACOX3                                           | ARHGEF3                                                 |
| ACVR1;ACVR1                                           | ACP5;ACP5;ACP5;ACP5                                   | ARHGEF6                                                 |
| ADAM21                                                | ACPL2;ACPL2                                           | ARMC5;ARMC5                                             |
| ADAMTS16                                              | ACSBG1                                                | ARMCX1                                                  |
| ADAMTS17                                              | ACSM5                                                 | ARMCX3;ARMCX3;ARMCX3                                    |
| ADAMTS19                                              | ACSS3                                                 | ARSD;ARSD                                               |
| ADAMTS2;ADAMTS2                                       | ACTL8                                                 | ART5;ART5                                               |
| ADAMTSL1                                              | ACTR10                                                | ASPG                                                    |
| ADARB2                                                | ADAM22;ADAM22;ADAM22;ADAM22;ADAM22                    | ATP10A                                                  |
| ADCY8                                                 | ADAM29;ADAM29;ADAM29;ADAM29                           | ATP10B                                                  |
| ADCY9                                                 | ADAM3A;ADAM3A;ADAM3A                                  | ATP7B;ATP7B                                             |
| ADCYAP1                                               | ADAM6                                                 | ATP8A2                                                  |
| ADCYAP1;ADCYAP1                                       | ADAMTS12                                              | AXIN2                                                   |
| ADCYAP1R1                                             | ADAMTS14;ADAMTS14                                     | B3GAT1;B3GAT1                                           |
| ADPRHL1                                               | ADAMTS16                                              | BAI1                                                    |
| ADPRHL1;ADPRHL1                                       | ADAMTS5                                               | BCL11B;BCL11B                                           |
| ADRA1A;ADRA1A;ADRA1A;ADRA1A                           | ADAMTS6                                               | BCOR;BCOR                                               |
| AFF2;AFF2;AFF2;AFF2;AFF2;AFF2                         | ADAMTS7                                               | BCORL1                                                  |
| AFF3;AFF3                                             | ADAMTSL1;ADAMTSL1                                     | BEND4;BEND4                                             |
| AGBL4                                                 | ADAP1                                                 | BEND5;AGBL4                                             |
| AGTR1;AGTR1;AGTR1;AGTR1                               | ADAR                                                  | BRSK2                                                   |

|                                                     |                                     |                                                                                                                                                                                 |
|-----------------------------------------------------|-------------------------------------|---------------------------------------------------------------------------------------------------------------------------------------------------------------------------------|
| AKAP12                                              | ADARB2                              | BRUNOL4;BRUNOL4;BRUNOL4;BRUNOL4                                                                                                                                                 |
| AKD1                                                | ADCY2                               | BTNL2                                                                                                                                                                           |
| ALKBH8                                              | ADCY5                               | C10orf122;C10orf122                                                                                                                                                             |
| ALLC                                                | ADD2;ADD2;ADD2;ADD2;ADD2            | C12orf39                                                                                                                                                                        |
| ALOX5                                               | ADPRHL1;ADPRHL1                     | C12orf60                                                                                                                                                                        |
| ALPI                                                | ADRA1B                              | C13orf16                                                                                                                                                                        |
| ALX4                                                | ADRA2A                              | C14orf180                                                                                                                                                                       |
| AMDHD1                                              | ADRA2B                              | C18orf1;C18orf1                                                                                                                                                                 |
| AMPD3;AMPD3;AMPD3                                   | ADRB3                               | C19orf22                                                                                                                                                                        |
| AMPH;AMPH                                           | ADRB3;ADRB3                         | C1QTNF7;C1QTNF7                                                                                                                                                                 |
| ANAPC13;ANAPC13;CEP63;CEP63;CEP63;ANAPC13;CEP63     | AFF1;AFF1                           | C1orf87                                                                                                                                                                         |
| ANGPT4                                              | AFF3                                | C3orf22                                                                                                                                                                         |
| ANK1                                                | AFF3;AFF3                           | C3orf50                                                                                                                                                                         |
| ANK1;ANK1;ANK1;ANK1;ANK1                            | AFG3L1                              | C5orf28                                                                                                                                                                         |
| ANK1;ANK1;ANK1;ANK1;ANK1;ANK1;ANK1;ANK1;ANK1;MIR486 | AGAP1;AGAP1                         | C6orf10                                                                                                                                                                         |
| ANKRD34C;ANKRD34C                                   | AGBL1                               | C6orf174                                                                                                                                                                        |
| ANO2                                                | AGBL4                               | C7orf50;C7orf50;C7orf50                                                                                                                                                         |
| ANO4                                                | AGMAT                               | C8orf71                                                                                                                                                                         |
| AP1G1;AP1G1                                         | AGTR1;AGTR1;AGTR1;AGTR1             | C9orf129;WNK2                                                                                                                                                                   |
| APBA2;APBA2                                         | AGXT2                               | CACNA1C;CACNA1C;CACNA1C;CACNA1C;CACNA1C;CACNA1C;CACNA1C;CACNA1C;CACNA1C;CACNA1C;CACNA1C;CACNA1C;CACNA1C;CACNA1C;CACNA1C;CACNA1C;CACNA1C;CACNA1C;CACNA1C;CACNA1C;CACNA1C;CACNA1C |
| APCS                                                | AHCTF1                              | CACNA1D;CACNA1D;CACNA1D                                                                                                                                                         |
| APOL4;APOL4;APOL4;APOL4                             | AICDA                               | CACNA1H;CACNA1H                                                                                                                                                                 |
| ARHGAP25;ARHGAP25;ARHGAP25;ARHGAP25                 | AIF1;AIF1;AIF1                      | CACNA2D4                                                                                                                                                                        |
| ARHGAP6;AMELX;AMELX;AMELX;ARHGAP6                   | AIM2                                | CADM3;CADM3                                                                                                                                                                     |
| ARHGAP6;ARHGAP6                                     | AIRE;AIRE                           | CADPS;CADPS;CADPS                                                                                                                                                               |
| ARHGAP6;ARHGAP6;ARHGAP6                             | AKAP10                              | CALD1;CALD1;CALD1;CALD1;CALD1                                                                                                                                                   |
| ARHGEF10                                            | AKAP11                              | CAMTA1                                                                                                                                                                          |
| ARHGEF16                                            | AKAP4;AKAP4                         | CAPZA3;PLCZ1                                                                                                                                                                    |
| ARHGEF18;ARHGEF18                                   | AKAP7                               | CASQ2                                                                                                                                                                           |
| ARHGEF3                                             | AKAP7;AKAP7;AKAP7;AKAP7;AKAP7       | CASZ1;CASZ1                                                                                                                                                                     |
| ARHGEF6                                             | AKT3;AKT3                           | CCDC46;CCDC46                                                                                                                                                                   |
| ARMCS;ARMCS                                         | ALAS2;ALAS2;ALAS2                   | CCL18                                                                                                                                                                           |
| ARMCX1                                              | ALDH4A1;ALDH4A1;ALDH4A1             | CCR4                                                                                                                                                                            |
| ARMCX3;ARMCX3;ARMCX3                                | ALDH8A1;ALDH8A1                     | CDH18;CDH18                                                                                                                                                                     |
| ARMCX6;ARMCX6                                       | ALG12                               | CDH22                                                                                                                                                                           |
| ARNT2                                               | ALG14                               | CDR1                                                                                                                                                                            |
| ARSD;ARSD                                           | ALK                                 | CES1;CES1;CES1                                                                                                                                                                  |
| ART5;ART5                                           | ALPK1;ALPK1                         | CFHR2                                                                                                                                                                           |
| ARX                                                 | ALS2CR11;ALS2CR11;ALS2CR11;ALS2CR11 | CHL1                                                                                                                                                                            |
| ASAH2;ASAH2                                         | ALX3                                | CHN2                                                                                                                                                                            |
| ASAP1                                               | ALX4                                | CLCN5;MIR188;CLCN5                                                                                                                                                              |
| ASB11;ASB11                                         | AMMECR1;SNORD96B;AMMECR1;AMMECR1    | CLDN11                                                                                                                                                                          |
| ASCC1                                               | AMPH;AMPH                           | CLDN14;CLDN14                                                                                                                                                                   |



|                                 |                                         |                                                                                      |
|---------------------------------|-----------------------------------------|--------------------------------------------------------------------------------------|
| BRDT;BRDT                       | ARHGFE6                                 | DLGAP2                                                                               |
| BRS3                            | ARID4B;ARID4B                           | DLX5                                                                                 |
| BRSK2                           | ARMC4                                   | DLX6AS                                                                               |
| BRUNOL4;BRUNOL4;BRUNOL4;BRUNOL4 | ARMC5;ARMC5                             | DNAH11                                                                               |
| BRUNOL5                         | ARMCX1                                  | DNMT3A;DNMT3A;DNMT3A                                                                 |
| BRWD1;BRWD1                     | ARMCX2;ARMCX2                           | DOCK2                                                                                |
| BRWD3                           | ARMCX3;ARMCX3;ARMCX3                    | DOK6                                                                                 |
| BSND                            | ARRB1;ARRB1                             | DPP6;DPP6;DPP6                                                                       |
| BTNL2                           | ARSB;ARSB                               | DYRK4                                                                                |
| C10orf122;C10orf122             | ARSD;ARSD                               | DYSF;DYSF;DYSF;DYSF;DYSF;DYSF;DYSF;DYSF;DYSF;DYSF;DYSF;DYSF;DYSF;DYSF;DYSF;DYSF;DYSF |
| C10orf71;C10orf71               | ART5;ART5                               | EBF2                                                                                 |
| C10orf93                        | ASB15                                   | EBF3                                                                                 |
| C11orf21;TSPAN32;C11orf21       | ASCL2                                   | EFHA2                                                                                |
| C11orf64                        | ASGR1                                   | EFR3B                                                                                |
| C11orf87                        | ASPG                                    | EHMT1                                                                                |
| C12orf39                        | ASPM                                    | ELMO1                                                                                |
| C12orf59                        | ASPSCR1                                 | EMB                                                                                  |
| C12orf60                        | ASTN2;ASTN2;ASTN2                       | ERC2                                                                                 |
| C13orf16                        | ATF6B;ATF6B                             | ERG;ERG                                                                              |
| C14orf135                       | ATOH1                                   | ESR1                                                                                 |
| C14orf166                       | ATP10A                                  | ESX1                                                                                 |
| C14orf180                       | ATP10B                                  | EYA4;EYA4;EYA4                                                                       |
| C15orf27                        | ATP11A;ATP11A                           | FAM107A;FAM107A                                                                      |
| C15orf60                        | ATP13A1                                 | FAM107B                                                                              |
| C16orf80                        | ATP13A4                                 | FAM109A                                                                              |
| C16orf91                        | ATP1A4;ATP1A4                           | FAM125B                                                                              |
| C17orf28                        | ATP2A2;ATP2A2;ATP2A2                    | FAM13C;FAM13C;FAM13C;FAM13C                                                          |
| C17orf54                        | ATP4B                                   | FAM155A                                                                              |
| C18orf1;C18orf1                 | ATP6V1B1                                | FAM183B                                                                              |
| C18orf2;C18orf2;C18orf2;C18orf2 | ATP6V1E2                                | FAM20A                                                                               |
| C19orf22                        | ATP7B;ATP7B                             | FAM26F                                                                               |
| C1QTNF7;C1QTNF7                 | ATP8A1;ATP8A1                           | FAM38B                                                                               |
| C1QTNF9B                        | ATP8A2                                  | FAM49A                                                                               |
| C1QTNF9B;PCOTH;PCOTH            | ATP8B4                                  | FAM53A                                                                               |
| C1orf175;C1orf175               | ATRNL1                                  | FAM5C                                                                                |
| C1orf192                        | ATXN7L1;ATXN7L1                         | FAM69C                                                                               |
| C1orf87                         | AXIN2                                   | FAM84A                                                                               |
| C1orf96                         | AZI1;AZI1                               | FANCC                                                                                |
| C21orf29;KRTAP10-4              | B3GALT5;B3GALT5;B3GALT5;B3GALT5;B3GALT5 | FAT3                                                                                 |
| C21orf29;KRTAP10-5              | B3GAT1;B3GAT1                           | FBXL17                                                                               |
| C21orf56;C21orf56               | B3GAT2                                  | FBXL7                                                                                |
| C2orf43                         | B3GNT6                                  | FCGBP                                                                                |
| C2orf53                         | BACH2;BACH2                             | FCRL3                                                                                |
| C2orf82                         | BAI1                                    | FCRL5                                                                                |
| C2orf90;C2orf90                 | BAI3                                    | FEZF1;FEZF1                                                                          |
| C3orf22                         | BARX1                                   | FGF10                                                                                |



|                                    |                                     |                                                   |
|------------------------------------|-------------------------------------|---------------------------------------------------|
| CAMTA1                             | C10orf88                            | HRNBP3                                            |
| CAPZA3;PLCZ1                       | C10orf99;C10orf99                   | HSP90B3P                                          |
| CARD11                             | C11orf49;C11orf49;C11orf49;C11orf49 | HTR1A                                             |
| CARKD                              | C11orf53                            | IFT140                                            |
| CASQ2                              | C11orf74;RAG2                       | IGSF11;IGSF11                                     |
| CASZ1;CASZ1                        | C12orf12                            | INPP5A                                            |
| CBLN4                              | C12orf39                            | IPCEF1;IPCEF1;IPCEF1;IPCEF1                       |
| CCBE1                              | C12orf42;C12orf42                   | IQSEC1;IQSEC1                                     |
| CCDC144C                           | C12orf56;C12orf56                   | ITGA7;ITGA7;ITGA7                                 |
| CCDC144NL                          | C12orf60                            | ITIH5;ITIH5                                       |
| CCDC150                            | C12orf65;C12orf65                   | JAKMIP3                                           |
| CCDC46;CCDC46                      | C13orf16                            | JPH3                                              |
| CCDC68                             | C13orf26                            | KAL1                                              |
| CCDC68;CCDC68                      | C13orf27                            | KCNH7;KCNH7                                       |
| CCDC73                             | C13orf35                            | KCNK18                                            |
| CCL1                               | C13orf36                            | KCNMA1;KCNMA1;KCNMA1;KCNMA1                       |
| CCL18                              | C14orf132                           | KCNMB2;KCNMB2                                     |
| CCR4                               | C14orf145                           | KCNQ1;KCNQ1                                       |
| CD200R1;CD200R1;CD200R1;CD200R1    | C14orf177                           | KCNQ2;KCNQ2;KCNQ2;KCNQ2                           |
| CD226                              | C14orf180                           | KCNT2                                             |
| CD84                               | C14orf182                           | KCNV1                                             |
| CD8A;CD8A;CD8A;CD8A                | C14orf28                            | KCTD8                                             |
| CD8B;CD8B;CD8B                     | C14orf39                            | KHDC1L                                            |
| CD8B;CD8B;CD8B;CD8B;CD8B           | C14orf43                            | KIAA0146                                          |
| CD97;CD97;CD97                     | C14orf50                            | KIAA1429;KIAA1429                                 |
| CDC20B;GPX8;CDC20B;CDC20B          | C15orf33;DTWD1;DTWD1                | KIF26A                                            |
| CDH12;PMCHL1                       | C15orf43                            | KIF26B                                            |
| CDH18;CDH18                        | C15orf59                            | KIF2B                                             |
| CDH22                              | C16orf73;C16orf73;C16orf73          | KIRREL3;KIRREL3                                   |
| CDH4                               | C17orf104                           | KRT77                                             |
| CDH7;CDH7                          | C17orf51                            | KSR1                                              |
| CDK14                              | C18orf1;C18orf1                     | KSR2                                              |
| CDKAL1                             | C18orf26                            | L3MBTL4                                           |
| CDKL5                              | C18orf34;C18orf34;C18orf34          | LAMA2;LAMA2                                       |
| CDKN2BAS;CDKN2B;CDKN2B             | C18orf62                            | LBH                                               |
| CDR1                               | C19orf22                            | LDB2;LDB2                                         |
| CEBPA;LOC80054                     | C1QL2                               | LHX6;LHX6                                         |
| CEND1                              | C1QTNF1;C1QTNF1;C1QTNF1             | LOC100132354                                      |
| CES1;CES1;CES1                     | C1QTNF7                             | LOC100133545                                      |
| CES8                               | C1QTNF7;C1QTNF7                     | LOC100133612                                      |
| CFHR1                              | C1orf127                            | LOC100303728;SLC25A5                              |
| CFHR2                              | C1orf130                            | LOC145820;LOC145820                               |
| CHAT;CHAT;CHAT;CHAT;CHAT;CHAT;CHAT | C1orf131                            | LOC284661                                         |
| CHL1                               | C1orf141                            | LOC285768;LOC285768                               |
| CHMP2A;CHMP2A;UBE2M                | C1orf150                            | LOC285830;LOC285830                               |
| CHMP7                              | C1orf157                            | LOC339524;LOC339524;LOC339524;LOC339524;LOC339524 |
| CHN2                               | C1orf161                            | LOC388387                                         |













|                          |                                                                                                                                                                         |                         |
|--------------------------|-------------------------------------------------------------------------------------------------------------------------------------------------------------------------|-------------------------|
| FAM53A                   | COL11A2;COL11A2;COL11A2                                                                                                                                                 | SPON1                   |
| FAM53B                   | COL11A2;COL11A2;COL11A2;COL11A2                                                                                                                                         | SPRR2C                  |
| FAM5C                    | COL13A1;COL13A1;COL13A1;COL13A1;COL13A1;COL13A1;COL13A1;COL13A1;COL13A1;COL13A1;COL13A1;COL13A1;COL13A1;COL13A1;COL13A1;COL13A1;COL13A1;COL13A1;COL13A1;COL13A1;COL13A1 | ST6GALNAC3              |
| FAM69C                   | COL14A1                                                                                                                                                                 | ST6GALNAC5              |
| FAM71C;ANKS1B            | COL1A2                                                                                                                                                                  | STAB2                   |
| FAM84A                   | COL20A1                                                                                                                                                                 | STK10                   |
| FAM90A7                  | COL22A1                                                                                                                                                                 | STK32B                  |
| FAM9B                    | COL23A1                                                                                                                                                                 | STK32C                  |
| FANCC                    | COL24A1                                                                                                                                                                 | STXBP6                  |
| FAP                      | COL25A1;COL25A1                                                                                                                                                         | SV2C                    |
| FARP1                    | COL28A1                                                                                                                                                                 | SYCP2L                  |
| FAT3                     | COL5A1                                                                                                                                                                  | SYT7                    |
| FBP2                     | COL5A2;COL5A2                                                                                                                                                           | T                       |
| FBXL17                   | COL5A3                                                                                                                                                                  | TACC2;TACC2;TACC2;TACC2 |
| FBXL7                    | COL6A6                                                                                                                                                                  | TAS2R40                 |
| FCGBP                    | COL9A1;COL9A1                                                                                                                                                           | TBC1D16                 |
| FCRL2                    | COL9A2                                                                                                                                                                  | TBCD                    |
| FCRL3                    | COLEC10                                                                                                                                                                 | TCEAL8;TCEAL8           |
| FCRL5                    | COLEC11;COLEC11                                                                                                                                                         | TCERG1L                 |
| FEZF1;FEZF1              | COLQ;COLQ                                                                                                                                                               | TECTA                   |
| FGD3                     | COLQ;COLQ;COLQ                                                                                                                                                          | TERT;TERT               |
| FGF10                    | COMP                                                                                                                                                                    | TFAP2B                  |
| FGF13;FGF13;FGF13;FGF13  | CORIN                                                                                                                                                                   | TFAP2D                  |
| FGF16                    | CPA3                                                                                                                                                                    | TFF2                    |
| FGF6                     | CPA6;CPA6                                                                                                                                                               | TFF3                    |
| FGF9;FGF9                | CPE;MIR1979                                                                                                                                                             | TFPI2                   |
| FGGY;FGGY                | CPEB1;CPEB1;CPEB1;CPEB1                                                                                                                                                 | TGM3                    |
| FHIT;FHIT                | CPEB1;CPEB1;CPEB1;CPEB1;CPEB1;CPEB1;CPEB1                                                                                                                               | THSD4                   |
| FHL1;FHL1;FHL1;FHL1;FHL1 | CPEB3                                                                                                                                                                   | TMC2                    |
| FKBP5;LOC285847          | CPLX1                                                                                                                                                                   | TMEM163                 |
| FLJ12825                 | CPN1                                                                                                                                                                    | TMEM211                 |
| FLJ14107;BIN3            | CPO                                                                                                                                                                     | TMEM225                 |
| FLJ25328                 | CPSF1                                                                                                                                                                   | TMEM47                  |
| FLJ25328;FLJ25328        | CPT1B;CPT1B;CPT1B;CPT1B;CHKB-CPT1B;CPT1B;CPT1B;CPT1B;CPT1B;CPT1B;CPT1B;CPT1B                                                                                            | TNR                     |
| FLJ32063                 | CR1L                                                                                                                                                                    | TNS1                    |
| FLJ36000                 | CR2;CR2                                                                                                                                                                 | TNXB                    |
| FLJ41350                 | CRADD                                                                                                                                                                   | TPH2                    |
| FLJ44817                 | CRAMP1L                                                                                                                                                                 | TPO;TPO;TPO;TPO         |
| FLNA;FLNA                | CRB1                                                                                                                                                                    | TRAPPC9;TRAPPC9         |
| FMO2                     | CREB5                                                                                                                                                                   | TRHR                    |
| FMO3;FMO3                | CREB5;CREB5                                                                                                                                                             | TRIM15                  |
| FOLR3                    | CREB5;CREB5;CREB5                                                                                                                                                       | TRIM71                  |
| FOXP1;FOXP1              | CRHR1;CRHR1;CRHR1;CRHR1                                                                                                                                                 | TRPC6                   |



|                     |                         |  |
|---------------------|-------------------------|--|
| GPR156;GPR156       | CXorf61                 |  |
| GPR161              | CYFIP2;CYFIP2;CYFIP2    |  |
| GPR20               | CYGB                    |  |
| GPR31               | CYMP                    |  |
| GPR78               | CYP1A2                  |  |
| GPX6                | CYP26C1                 |  |
| GREB1               | CYP27C1                 |  |
| GRID2               | CYP2B6                  |  |
| GRIK1;GRIK1         | CYP2C8                  |  |
| GRIK2;GRIK2;GRIK2   | CYP2D7P1                |  |
| GRIP2               | CYP2J2                  |  |
| GRK7                | CYP39A1                 |  |
| GRM1;GRM1;GRM1;GRM1 | CYP3A43;CYP3A43;CYP3A43 |  |
| GRM3                | CYP4F22                 |  |
| GRM4                | CYP4V2                  |  |
| GRM6                | CYP7B1                  |  |
| GRM7;GRM7           | CYTIP                   |  |
| GRM8;GRM8;GRM8      | D2HGDH                  |  |
| GSG1L               | DAAM2                   |  |
| GSTA5               | DAB1                    |  |
| GSTM3;GSTM3         | DAB2IP                  |  |
| GSTT1               | DACH1;DACH1;DACH1       |  |
| GTF2B               | DACH2;DACH2             |  |
| GTF2H4              | DACT1;DACT1             |  |
| GTSF1L;GTSF1L       | DACT1;DACT1;DACT1;DACT1 |  |
| GUCA2B              | DAGLA                   |  |
| GUCY2F              | DAXX;DAXX;DAXX;DAXX     |  |
| GZMA                | DBX1                    |  |
| H1FNT               | DBX2                    |  |
| H1FOO               | DCAF12L1                |  |
| H2BFWT;MIR1256      | DCAF12L2                |  |
| HACE1               | DCAF4L2                 |  |
| HAR1B;HAR1A         | DCAF8L2                 |  |
| HCCA2               | DCC                     |  |
| HCG22               | DCC;DCC                 |  |
| HCK                 | DCD                     |  |
| HCRTR2              | DCLK1                   |  |
| HDGF;HDGF;HDGF      | DCLK2;DCLK2             |  |
| HEATR2              | DCN;DCN;DCN;DCN;DCN;DCN |  |
| HELLS               | DCTN1;DCTN1;DCTN1;DCTN1 |  |
| HELT                | DDC                     |  |
| HES1                | DDIT4L                  |  |
| HGF;HGF;HGF;HGF;HGF | DDX26B                  |  |
| HIST1H1D            | DEFA4                   |  |
| HLA-DMB             | DEFA6                   |  |
| HLA-DPA1            | DEFB113                 |  |
| HLA-DQA1            | DEFB127                 |  |

|                                                             |                                                                       |  |
|-------------------------------------------------------------|-----------------------------------------------------------------------|--|
| HLA-DQA2                                                    | DENND3                                                                |  |
| HLA-DQB1                                                    | DEPDC5;DEPDC5;DEPDC5                                                  |  |
| HLA-DQB2                                                    | DEPDC7;DEPDC7                                                         |  |
| HLA-DRA                                                     | DGCR9                                                                 |  |
| HLA-DRB1                                                    | DGKQ                                                                  |  |
| HLA-DRB6                                                    | DGKZ;DGKZ;DGKZ;DGKZ                                                   |  |
| HLA-E                                                       | DHDDS;DHDDS                                                           |  |
| HMGA1;HMGA1;HMGA1;HMGA1;HMGA1;HMGA1                         | DHRS4                                                                 |  |
| HMGB4;CSMD2;HMGB4                                           | DIP2C                                                                 |  |
| HMH1                                                        | DIP2C;C10orf108                                                       |  |
| HMX2                                                        | DIRAS1                                                                |  |
| HNF1B;HNF1B                                                 | DIRAS3                                                                |  |
| HOPX;HOPX;HOPX;HOPX;HOPX                                    | DIRC3                                                                 |  |
| HOXA5                                                       | DISC1;DISC1;DISC1;DISC1;DISC1;TSNAX-<br>DISC1;DISC1;DISC1;DISC1;DISC1 |  |
| HOXB9                                                       | DKK2                                                                  |  |
| HOXD13                                                      | DLC1;DLC1                                                             |  |
| HOXD3                                                       | DLG2;DLG2                                                             |  |
| HOXD4                                                       | DLG3                                                                  |  |
| HOXD9                                                       | DLGAP1;DLGAP1                                                         |  |
| HPCAL4                                                      | DLGAP2                                                                |  |
| HPSE2;HPSE2;HPSE2;HPSE2                                     | DLL1                                                                  |  |
| HRNP3                                                       | DLX4;DLX4                                                             |  |
| HSD11B1;HSD11B1                                             | DLX5                                                                  |  |
| HSP90B3P                                                    | DLX6AS                                                                |  |
| HTR1A                                                       | DMD;DMD;DMD;DMD;DMD;DMD;DMD                                           |  |
| HTR3B                                                       | DMGDH                                                                 |  |
| HTR6                                                        | DNA2                                                                  |  |
| HYDIN                                                       | DNAH11                                                                |  |
| HYMAI;PLAGL1;PLAGL1;PLAGL1;PLAGL1;PLAGL1;PLAGL1;<br>;PLAGL1 | DNAH12                                                                |  |
| ICA1;ICA1;ICA1                                              | DNAH17                                                                |  |
| IER5                                                        | DNAH8                                                                 |  |
| IFT140                                                      | DNAH9;DNAH9                                                           |  |
| IFT140;TMEM204                                              | DNER                                                                  |  |
| IGF1;IGF1;IGF1;IGF1                                         | DNMT3A;DNMT3A;DNMT3A                                                  |  |
| IGF1R                                                       | DOC2A                                                                 |  |
| IGSF11;IGSF11                                               | DOC2B                                                                 |  |
| IGSF21                                                      | DOCK10                                                                |  |
| IKZF1                                                       | DOCK2                                                                 |  |
| IKZF2;IKZF2                                                 | DOCK4                                                                 |  |
| IL13RA2                                                     | DOK4                                                                  |  |
| IL17REL                                                     | DOK6                                                                  |  |
| IL18RAP                                                     | DOLPP1;DOLPP1                                                         |  |
| IL19;IL19                                                   | DPP6;DPP6;DPP6                                                        |  |
| IL21;IL21                                                   | DPYD;DPYD                                                             |  |
| IL31;LRRC43                                                 | DPYS                                                                  |  |





|                               |                                                                                     |  |
|-------------------------------|-------------------------------------------------------------------------------------|--|
| KIAA1217                      | EMX1                                                                                |  |
| KIAA1324L;KIAA1324L;KIAA1324L | EMX2;EMX2;EMX2OS;EMX2;EMX2                                                          |  |
| KIAA1409                      | EMX2OS                                                                              |  |
| KIAA1429;KIAA1429             | EN1                                                                                 |  |
| KIAA1486                      | ENAM                                                                                |  |
| KIAA1751                      | ENGASE                                                                              |  |
| KIF13B                        | ENOX1                                                                               |  |
| KIF17;KIF17                   | ENOX1;ENOX1                                                                         |  |
| KIF1A                         | ENPP7                                                                               |  |
| KIF26A                        | ENTHD1                                                                              |  |
| KIF26B                        | ENTPD1;ENTPD1;ENTPD1;ENTPD1;ENTPD1;ENTPD1;ENTPD1                                    |  |
| KIF2B                         | ENTPD1;ENTPD1;ENTPD1;ENTPD1;ENTPD1;ENTPD1;ENTPD1;ENTPD1;ENTPD1;ENTPD1;ENTPD1;ENTPD1 |  |
| KIR2DS4                       | EPHA10                                                                              |  |
| KIR3DL2                       | EPHA10;EPHA10                                                                       |  |
| KIRREL3;KIRREL3               | EPHA6                                                                               |  |
| KLF12                         | EPHB1                                                                               |  |
| KLF5                          | ERAS                                                                                |  |
| KLF8;KLF8                     | ERC2                                                                                |  |
| KLF8;KLF8;KLF8                | ERG;ERG                                                                             |  |
| KLHL14                        | ERP29;ERP29                                                                         |  |
| KLHL30                        | ESAM                                                                                |  |
| KLK8;KLK8;KLK8;KLK8           | ESCO1                                                                               |  |
| KNDC1                         | ESPNL                                                                               |  |
| KRT7                          | ESR1                                                                                |  |
| KRT77                         | ESRRG;ESRRG;ESRRG                                                                   |  |
| KRT78;KRT78                   | ESX1                                                                                |  |
| KRT85                         | ESYT3                                                                               |  |
| KRTAP10-7;C21orf29            | ETS1                                                                                |  |
| KRTAP19-4                     | ETV2                                                                                |  |
| KRTAP4-3                      | ETV3L                                                                               |  |
| KRTAP5-5;HCCA2                | EVC2;EVC2                                                                           |  |
| KSR1                          | EVX1;EVX1                                                                           |  |
| KSR2                          | EVX2                                                                                |  |
| L1CAM;L1CAM;L1CAM             | EXOC2                                                                               |  |
| L3MBTL4                       | EXOC3                                                                               |  |
| LAMA2;LAMA2                   | EXOC4                                                                               |  |
| LAX1;LAX1;LAX1                | EXOSC6                                                                              |  |
| LAX1;LAX1;LAX1;LAX1           | EYA4;EYA4;EYA4                                                                      |  |
| LBH                           | EYS                                                                                 |  |
| LBXCOR1                       | F11                                                                                 |  |
| LCE4A;LCE4A                   | F2R                                                                                 |  |
| LCLAT1;LCLAT1                 | FABP1                                                                               |  |
| LCT                           | FADS6                                                                               |  |
| LDB2;LDB2                     | FAM101A                                                                             |  |
| LHX2                          | FAM107A;FAM107A                                                                     |  |
| LHX6;LHX6                     | FAM107B                                                                             |  |

|                                                         |                                        |  |
|---------------------------------------------------------|----------------------------------------|--|
| LIPI                                                    | FAM109A                                |  |
| LMO7;LMO7                                               | FAM110B                                |  |
| LMX1B                                                   | FAM125B                                |  |
| LOC100127888;SLCO4A1                                    | FAM132A                                |  |
| LOC100132354                                            | FAM133B;FAM133B                        |  |
| LOC100132963                                            | FAM13C;FAM13C;FAM13C;FAM13C            |  |
| LOC100133545                                            | FAM155A                                |  |
| LOC100133612                                            | FAM159B                                |  |
| LOC100240735;FLJ12825                                   | FAM162B                                |  |
| LOC100271715;LOC375196                                  | FAM163A                                |  |
| LOC100302652                                            | FAM172A;POU5F2;FAM172A;FAM172A;FAM172A |  |
| LOC100303728;SLC25A5                                    | FAM179A                                |  |
| LOC145820;LOC145820                                     | FAM183B                                |  |
| LOC148145                                               | FAM184B                                |  |
| LOC149134                                               | FAM188B                                |  |
| LOC154822                                               | FAM189A1                               |  |
| LOC200726                                               | FAM20A                                 |  |
| LOC221122                                               | FAM26D;BET3L                           |  |
| LOC254312;LOC254312;LOC254312                           | FAM26F                                 |  |
| LOC255167;LOC255167                                     | FAM27L                                 |  |
| LOC284661                                               | FAM38A                                 |  |
| LOC284798;LOC284798                                     | FAM38B                                 |  |
| LOC285370                                               | FAM47C                                 |  |
| LOC285768;LOC285768                                     | FAM49A                                 |  |
| LOC285830;LOC285830                                     | FAM53A                                 |  |
| LOC339290;C18orf18                                      | FAM55B                                 |  |
| LOC339524;LOC339524;LOC339524;LOC339524;LOC339524       | FAM55D;FAM55D                          |  |
| LOC340094                                               | FAM59A                                 |  |
| LOC347376                                               | FAM5C                                  |  |
| LOC374443                                               | FAM65B;FAM65B                          |  |
| LOC388387                                               | FAM69C                                 |  |
| LOC391322                                               | FAM71C;FAM71C;ANKS1B                   |  |
| LOC401463                                               | FAM81B                                 |  |
| LOC404266;LOC404266;LOC404266;LOC404266;HOXB6;LOC404266 | FAM82A1                                |  |
| LOC407835                                               | FAM83B                                 |  |
| LOC440040                                               | FAM83E                                 |  |
| LOC442459                                               | FAM84A                                 |  |
| LOC552889;LOC552889                                     | FAM91A1                                |  |
| LOC641367;ZNF100                                        | FAM92A1                                |  |
| LOC641518;LOC641518                                     | FAM9A;FAM9A;FAM9A                      |  |
| LOC642597                                               | FANCC                                  |  |
| LOC645323;LOC645323;LOC645323                           | FAT3                                   |  |
| LOC646813                                               | FAT4                                   |  |
| LOC646982;LOC646982;LOC646982                           | FBLN5;FBLN5                            |  |
| LONRF2                                                  | FBN1                                   |  |
| LPAR1;LPAR1                                             | FBP1;FBP1                              |  |

|                                     |                               |  |
|-------------------------------------|-------------------------------|--|
| LPO;LPO;LPO                         | FBXL17                        |  |
| LRFN1                               | FBXL7                         |  |
| LRRC2                               | FBXO15;FBXO15                 |  |
| LRRC2;LRRC2                         | FBXO22;FBXO22                 |  |
| LRRC30                              | FBXO40                        |  |
| LRRC32;LRRC32                       | FBXW7                         |  |
| LRRC3B                              | FCER2                         |  |
| LRRN1                               | FCER2;FCER2                   |  |
| LRRN2;LRRN2                         | FCGBP                         |  |
| LRTM1;CACNA2D3                      | FCRL1;FCRL1;FCRL1             |  |
| LUZP2                               | FCRL3                         |  |
| LY9;LY9                             | FCRL5                         |  |
| LYPD6B                              | FER1L5                        |  |
| LYZL2                               | FES;FES;FES;FES               |  |
| LYZL4                               | FEZF1;FEZF1                   |  |
| M6PR;PHC1                           | FEZF2                         |  |
| MAD1L1;MAD1L1;MAD1L1                | FFAR1                         |  |
| MAGEA5                              | FGF10                         |  |
| MAGED2;MAGED2                       | FGF12                         |  |
| MAGEE1                              | FGF13;FGF13;FGF13;FGF13;FGF13 |  |
| MAGEF1                              | FGF14                         |  |
| MAGI2                               | FGF18                         |  |
| MAGIX;MAGIX;MAGIX;MAGIX             | FGF2                          |  |
| MAGT1                               | FGF20                         |  |
| MAML2                               | FGF4                          |  |
| MAML3                               | FGF7;C15orf33                 |  |
| MAMLD1                              | FGFR1;FGFR1;FGFR1;FGFR1;FGFR1 |  |
| MAOA                                | FGGY;FGGY                     |  |
| MAP2                                | FHL5;FHL5                     |  |
| MAP7D2;MAP7D2;MAP7D2;MAP7D2         | FHOD3                         |  |
| MAPK12                              | FIBIN                         |  |
| MARCH8;MARCH8                       | FIGNL2;FIGNL2                 |  |
| MARK1                               | FILIP1                        |  |
| MARS                                | FKBP5                         |  |
| MAS1L                               | FLI1;FLI1                     |  |
| MBD3L1                              | FLJ12825                      |  |
| MBNL3;MBNL3;MBNL3;MBNL3;MBNL3;MBNL3 | FLJ22536                      |  |
| MBTPS2                              | FLJ25328                      |  |
| MCART2;MCART2                       | FLJ25328;FLJ25328             |  |
| MCART6                              | FLJ32063                      |  |
| MCF2L                               | FLJ36000                      |  |
| MCF2L;MCF2L                         | FLJ37201                      |  |
| MCHR2;MCHR2                         | FLJ39653;FLJ39653             |  |
| MCM10;MCM10                         | FLJ41350                      |  |
| MDGA1                               | FLJ43390                      |  |
| MDGA2;MDGA2                         | FLT1                          |  |
| MECP2;MECP2                         | FLT1;FLT1;FLT1;FLT1           |  |

|                                                             |                         |  |
|-------------------------------------------------------------|-------------------------|--|
| MED12L                                                      | FLT3                    |  |
| MEG3;MEG3;MEG3                                              | FLVCR2                  |  |
| MEGF11                                                      | FMN2                    |  |
| MEGF6                                                       | FMO2                    |  |
| MEIS2;MEIS2;MEIS2;MEIS2;MEIS2;MEIS2;MEIS2                   | FMO4;TOP1P1             |  |
| MEOX2                                                       | FN1;FN1;FN1;FN1;FN1;FN1 |  |
| MEOX2;MEOX2                                                 | FNDC1                   |  |
| MFI2;MFI2                                                   | FOLH1B;FOLH1B           |  |
| MGA;MGA                                                     | FOX12                   |  |
| MGAT4C                                                      | FOXK1                   |  |
| MGAT5B;MGAT5B                                               | FOXN3                   |  |
| MGC16121;MIR424;MIR503                                      | FOXP1                   |  |
| MGLL;MGLL                                                   | FOXP2;FOXP2;FOXP2       |  |
| MGMT                                                        | FRAS1;FRAS1             |  |
| MICB                                                        | FREM3                   |  |
| MIER1;WDR78;MIER1;MIER1;MIER1;MIER1;MIER1;MIER1;WDR78;MIER1 | FRMD1;FRMD1             |  |
| MIR124-1;LOC157627                                          | FRMD3                   |  |
| MIR127;RTL1                                                 | FRMPD4                  |  |
| MIR129-1                                                    | FRMPD4;FRMPD4           |  |
| MIR181C;MIR181D                                             | FRZB                    |  |
| MIR20B;MIR363;MIR106A;MIR18B;MIR19B2;MIR92A2                | FSHB;FSHB               |  |
| MIR299;MIR411                                               | FSHR;FSHR               |  |
| MIR372;MIR371;MIR373                                        | FSTL4                   |  |
| MIR409;MIR410;MIR412;MIR369;MIR656                          | FUT4                    |  |
| MIR410;MIR412;MIR369;MIR656                                 | FUT4;FUT4               |  |
| MIR411;MIR379                                               | FUT5                    |  |
| MIR412;MIR541;MIR409;MIR369                                 | FUZ                     |  |
| MIR453;MIR485;MIR668                                        | FXYD1;FXYD1             |  |
| MIR485;MIR453;MIR668                                        | FYN;FYN;FYN             |  |
| MIR488;ASTN1;ASTN1                                          | FZD4                    |  |
| MIR492                                                      | FZD5                    |  |
| MIR507;MIR506                                               | G0S2                    |  |
| MIR516A2                                                    | GAB1;GAB1               |  |
| MIR518A2                                                    | GAB3;GAB3               |  |
| MIR520E                                                     | GABBR1;GABBR1;GABBR1    |  |
| MIR525                                                      | GABBR2                  |  |
| MIR548F3;CNTNAP2                                            | GABRA2;GABRA2           |  |
| MIR548I4;CNTNAP2                                            | GABRA4                  |  |
| MIR592;GRM8;GRM8;GRM8                                       | GABRB3;GABRB3           |  |
| MKX                                                         | GABRG3                  |  |
| MLLT11                                                      | GABRP                   |  |
| MLXIPL;MLXIPL;MLXIPL;MLXIPL                                 | GAL                     |  |
| MMP12;MMP12                                                 | GALC;GALC               |  |
| MMP15                                                       | GALNS;TRAPPC2L          |  |
| MN1                                                         | GALNT13                 |  |

|                                                 |                                        |  |
|-------------------------------------------------|----------------------------------------|--|
| MOG;MOG;MOG;MOG;MOG;MOG;MOG;MOG;MOG;MOG;MOG     | GALNT9                                 |  |
| MOSC1                                           | GALNT9;LOC100130238                    |  |
| MPO                                             | GALR2                                  |  |
| MPP7                                            | GAPT                                   |  |
| MPPED2;MPPED2                                   | GAS2L1;GAS2L1;GAS2L1                   |  |
| MRPL42P5                                        | GAS7;GAS7;GAS7                         |  |
| MRPS28                                          | GAS7;GAS7;GAS7;GAS7                    |  |
| MS4A14;MS4A14;MS4A14;MS4A14                     | GATA1                                  |  |
| MSMB;MSMB                                       | GATAD2B                                |  |
| MSN                                             | GBGT1                                  |  |
| MSR1;MSR1;MSR1                                  | GBP4;GBP4                              |  |
| MTA1                                            | GBP7                                   |  |
| MTMR7                                           | GCC2;GCC2                              |  |
| MUC12                                           | GCET2;GCET2                            |  |
| MUC15;ANO3;MUC15;MUC15                          | GCG                                    |  |
| MUC4;MUC4;MUC4                                  | GCK;GCK;GCK                            |  |
| MUC5B                                           | GCNT7                                  |  |
| MUM1L1                                          | GDF3                                   |  |
| MXRA5                                           | GDF6                                   |  |
| MYBPC2                                          | GF11;GF11;GF11                         |  |
| MYEF2                                           | GFPT2                                  |  |
| MYF5                                            | GFRA2;GFRA2;GFRA2                      |  |
| MYH1                                            | GFRAL                                  |  |
| MYH13                                           | GGTLC1                                 |  |
| MYH14;MYH14;MYH14                               | GHSR;GHSR                              |  |
| MYH7                                            | GIMAP7                                 |  |
| MYH8                                            | GIMAP8                                 |  |
| MYO16                                           | GJA3                                   |  |
| MYO1E                                           | GJD4                                   |  |
| MYO7A;MYO7A;MYO7A                               | GLB1L3                                 |  |
| MYO7B                                           | GLDN                                   |  |
| MYOC                                            | GLI2                                   |  |
| MYT1L                                           | GLIS1                                  |  |
| NACAD                                           | GLP2R                                  |  |
| NADK                                            | GLT25D2                                |  |
| NBEA                                            | GLYATL3                                |  |
| NCALD;NCALD;NCALD;NCALD;NCALD;NCALD;NCALD       | GNAI1                                  |  |
| NCALD;NCALD;NCALD;NCALD;NCALD;NCALD;NCALD;NCALD | GNAO1;GNAO1                            |  |
| NCAM1;NCAM1                                     | GNAS;GNAS;GNAS                         |  |
| NCAN                                            | GNB1                                   |  |
| NCKAP1L                                         | GNG7                                   |  |
| NCKAP5;NCKAP5                                   | GNPDA2                                 |  |
| NCRNA00029                                      | GOLGA3                                 |  |
| NCRNA00086                                      | GPC6                                   |  |
| NCRNA00171                                      | GPER;C7orf50;GPER;C7orf50;C7orf50;GPER |  |

|                                  |                                        |  |
|----------------------------------|----------------------------------------|--|
| NCRNA00207;NCRNA00207;NCRNA00207 | GPER;GPER;C7orf50;C7orf50;C7orf50;GPER |  |
| NDFIP2;NDFIP2                    | GPHB5                                  |  |
| NDNL2;FAM189A1;NDNL2             | GPLD1;GPLD1                            |  |
| NDRG4;NDRG4;NDRG4                | GPM6A;GPM6A                            |  |
| NEBL;NEBL                        | GPR113;GPR113;GPR113                   |  |
| NECAB2                           | GPR119                                 |  |
| NFASC;NFASC;NFASC;NFASC          | GPR123                                 |  |
| NFASC;NFASC;NFASC;NFASC;NFASC    | GPR133                                 |  |
| NFATC1;NFATC1;NFATC1;NFATC1      | GPR158                                 |  |
| NFIA;NFIA;NFIA;NFIA              | GPR20                                  |  |
| NHSL1;NHSL1                      | GPR37                                  |  |
| NKAIN2                           | GPR6                                   |  |
| NKAIN4                           | GPR63;GPR63                            |  |
| NKG7                             | GPR83                                  |  |
| NKX2-4                           | GPR98;GPR98                            |  |
| NLGN1                            | GPRIN2                                 |  |
| NLGN4X;NLGN4X                    | GPX5;GPX5                              |  |
| NLRP10                           | GRAP2                                  |  |
| NLRP3;NLRP3;NLRP3;NLRP3;NLRP3    | GRASP                                  |  |
| NLRP7;NLRP7;NLRP7                | GREM1                                  |  |
| NMNAT2;NMNAT2                    | GRIA4;GRIA4;GRIA4;GRIA4                |  |
| NOD2                             | GRID2                                  |  |
| NODAL                            | GRIK1;GRIK1                            |  |
| NOTCH4                           | GRIK2;GRIK2;GRIK2;GRIK2;GRIK2;GRIK2    |  |
| NOX4;NOX4;NOX4;NOX4              | GRIK3                                  |  |
| NPAT                             | GRIK5                                  |  |
| NPFF                             | GRIN2A;GRIN2A;GRIN2A                   |  |
| NPHS2                            | GRIN2B                                 |  |
| NPPA                             | GRK1                                   |  |
| NPY5R                            | GRK5                                   |  |
| NR2E1                            | GRK7                                   |  |
| NR3C2;NR3C2                      | GRM1;GRM1                              |  |
| NR4A3;NR4A3;NR4A3;NR4A3          | GRM1;GRM1;GRM1;GRM1                    |  |
| NRAP;NRAP                        | GRM5                                   |  |
| NRG1                             | GRM7;GRM7                              |  |
| NRG3;NRG3;NRG3                   | GRXCR1                                 |  |
| NRSN1                            | GSG1L                                  |  |
| NRXN1;NRXN1                      | GSTCD;GSTCD                            |  |
| NRXN2;NRXN2                      | GSTT1                                  |  |
| NRXN3;NRXN3;NRXN3                | GTF3C3                                 |  |
| NSDHL;NSDHL                      | GUCA2B                                 |  |
| NTF3                             | GUCY1A2                                |  |
| NTF3;NTF3                        | GUCY1B2                                |  |
| NTM                              | GUCY2D                                 |  |
| NTM;NTM;NTM;NTM                  | GUCY2F;GUCY2F                          |  |
| NTNG2                            | GUSBL1                                 |  |
| NTRK3;NTRK3;NTRK3                | GUSBL2                                 |  |

|                 |                                                     |  |
|-----------------|-----------------------------------------------------|--|
| NUDT9P1         | H1FNT                                               |  |
| NXF2;NXF2B;NXF2 | H1FOO                                               |  |
| NXN             | H2AFY2                                              |  |
| NYNRIN          | HACE1                                               |  |
| OBSCN;OBSCN     | HAL                                                 |  |
| OBSL1           | HAND1                                               |  |
| OCA2            | HBA1                                                |  |
| OCM             | HCCA2                                               |  |
| OCRL;OCRL       | HCCA2;DUSP8                                         |  |
| ODF2L;ODF2L     | HCCA2;KRTAP5-1;LOC338651                            |  |
| ODF3L2          | HCCS;HCCS                                           |  |
| ODZ1;ODZ1;ODZ1  | HCG4P6                                              |  |
| ODZ2            | HCLS1                                               |  |
| ODZ4            | HCN1                                                |  |
| OLFML1          | HCN4                                                |  |
| OLIG1           | HDAC2                                               |  |
| OLIG1;OLIG1     | HDAC4                                               |  |
| OPCML           | HDAC4;MGC16025                                      |  |
| OPCML;OPCML     | HDC                                                 |  |
| OR10C1          | HEATR7B2                                            |  |
| OR10G3          | HECW1                                               |  |
| OR10G9          | HECW2                                               |  |
| OR10H5          | HEPHL1                                              |  |
| OR10S1          | HEXDC                                               |  |
| OR11H4          | HEY2                                                |  |
| OR12D2          | HGC6.3                                              |  |
| OR12D3          | HGF;HGF;HGF;HGF;HGF;HGF;HGF;HGF;HGF;HGF;HGF;HGF;HGF |  |
| OR1M1           | HHIP                                                |  |
| OR1S2           | HHIPL1                                              |  |
| OR2C3           | HHIPL1;HHIPL1                                       |  |
| OR2D2           | HHLA1                                               |  |
| OR2G6           | HIST1H1A                                            |  |
| OR2H2           | HLA-DMA                                             |  |
| OR2J2           | HLA-DOA                                             |  |
| OR2L3;OR2L13    | HLA-DPB1                                            |  |
| OR4B1           | HLA-DQB1                                            |  |
| OR4C6           | HLA-DQB2                                            |  |
| OR4D1           | HLA-DRA                                             |  |
| OR4D5           | HLA-DRB6                                            |  |
| OR4M1           | HLA-G                                               |  |
| OR4S1           | HLA-L                                               |  |
| OR51B5          | HLCS                                                |  |
| OR51D1          | HLF                                                 |  |
| OR51E2          | HLX                                                 |  |
| OR51S1          | HMGCLL1;HMGCLL1                                     |  |
| OR52W1          | HMGNS                                               |  |
| OR5B12          | HNF1B;HNF1B;HNF1B;HNF1B                             |  |







|                                                         |                                           |  |
|---------------------------------------------------------|-------------------------------------------|--|
| PLCG2                                                   | KCNE1                                     |  |
| PLCH2                                                   | KCNE4;KCNE4                               |  |
| PLD5                                                    | KCNG2                                     |  |
| PLEKHA2                                                 | KCNG3;KCNG3                               |  |
| PLEKHA5;PLEKHA5                                         | KCNH6;KCNH6                               |  |
| PLG;PLG                                                 | KCNH7;KCNH7                               |  |
| PLIN5                                                   | KCNH8                                     |  |
| PLXNB3;PLXNB3                                           | KCNIP1;KCNMB1                             |  |
| PLXNC1                                                  | KCNIP2;KCNIP2;KCNIP2;KCNIP2;KCNIP2;KCNIP2 |  |
| PNCK;PNCK                                               | KCNIP4                                    |  |
| PNLIP                                                   | KCNJ10                                    |  |
| PNPLA7;PNPLA7                                           | KCNJ6                                     |  |
| POLA1                                                   | KCNK10;KCNK10                             |  |
| POM121L12                                               | KCNK13                                    |  |
| POMC;POMC                                               | KCNK17;KCNK17                             |  |
| PON1                                                    | KCNK18                                    |  |
| PORCN;PORCN;PORCN;PORCN;PORCN                           | KCNK7;KCNK7;KCNK7;KCNK7                   |  |
| POTEA;POTEA                                             | KCNMA1;KCNMA1;KCNMA1;KCNMA1               |  |
| POU3F1                                                  | KCNMB1;KCNIP1                             |  |
| POU4F2;POU4F2                                           | KCNMB2;KCNMB2                             |  |
| POU4F3                                                  | KCNMB3;KCNMB3                             |  |
| POU6F1;POU6F1                                           | KCNMB4                                    |  |
| POU6F2;POU6F2                                           | KCNQ1;KCNQ1                               |  |
| PPAP2A;PPAP2A;RNF138P1                                  | KCNQ1;KCNQ1OT1;KCNQ1                      |  |
| PPEF1;PPEF1;PPEF1                                       | KCNQ1DN                                   |  |
| PPEF1;PPEF1;PPEF1;PPEF1;PPEF1;PPEF1                     | KCNQ2;KCNQ2;KCNQ2;KCNQ2                   |  |
| PPFIA1;PPFIA1;MIR548K                                   | KCNQ4;KCNQ4                               |  |
| PPFIA4                                                  | KCS1                                      |  |
| PPIG                                                    | KCNT2                                     |  |
| PPIL6;PPIL6                                             | KCNU1                                     |  |
| PPM1A                                                   | KCNV1                                     |  |
| PPM1L                                                   | KCTD8                                     |  |
| PPP1R16B                                                | KDM3A;KDM3A                               |  |
| PPP2R2B;PPP2R2B;PPP2R2B;PPP2R2B;PPP2R2B;PPP2R2B;PPP2R2B | KDR                                       |  |
| PPP2R2C;PPP2R2C                                         | KHDC1L                                    |  |
| PPY                                                     | KIAA0146                                  |  |
| PRAC;C17orf93                                           | KIAA0427;KIAA0427                         |  |
| PRB4                                                    | KIAA0556                                  |  |
| PRDM11                                                  | KIAA0664                                  |  |
| PRDM11;PRDM11                                           | KIAA0748;KIAA0748                         |  |
| PRDM16;PRDM16                                           | KIAA1211                                  |  |
| PRDM2;PRDM2;PRDM2                                       | KIAA1239                                  |  |
| PRDM5                                                   | KIAA1257                                  |  |
| PRDM6                                                   | KIAA1274                                  |  |
| PRDM7                                                   | KIAA1429;KIAA1429                         |  |
| PREX2;PREX2                                             | KIAA1462                                  |  |

|                                                                       |                                    |  |
|-----------------------------------------------------------------------|------------------------------------|--|
| PRF1;PRF1                                                             | KIAA1549;KIAA1549                  |  |
| PRIM2                                                                 | KIAA1586                           |  |
| PRKAR1B;PRKAR1B;PRKAR1B;PRKAR1B;PRKAR1B;PRKAR1B                       | KIAA1688                           |  |
| PRKCE                                                                 | KIAA1875                           |  |
| PRKCG                                                                 | KIAA1908;KIAA1908;KIAA1908         |  |
| PRKG1;PRKG1                                                           | KIF19                              |  |
| PRL;PRL                                                               | KIF21B                             |  |
| PRLR                                                                  | KIF26A                             |  |
| PRO0611;PUM1;PUM1                                                     | KIF26B                             |  |
| PROL1                                                                 | KIF2B                              |  |
| PROZ                                                                  | KIF5C                              |  |
| PRPF40A                                                               | KIF6                               |  |
| PRR18;PRR18                                                           | KIRREL3;KIRREL3                    |  |
| PRR5L;PRR5L;PRR5L;PRR5L                                               | KIT;KIT                            |  |
| PRRG1;PRRG1                                                           | KITLG;KITLG                        |  |
| PRRX1;PRRX1                                                           | KLB                                |  |
| PRRX2                                                                 | KLHL13;KLHL13;KLHL13;KLHL13;KLHL13 |  |
| PSD3;PSD3                                                             | KLHL1;ATXN8OS                      |  |
| PSG4;PSG4                                                             | KLHL26                             |  |
| PSMA4;PSMA4;PSMA4                                                     | KLHL29                             |  |
| PSTPIP1                                                               | KLHL3                              |  |
| PTBP2                                                                 | KLHL34                             |  |
| PTCHD1                                                                | KLHL36                             |  |
| PTCHD2                                                                | KLHL6                              |  |
| PTGDR                                                                 | KLK13                              |  |
| PTGER3;PTGER3;PTGER3;PTGER3;PTGER3;PTGER3;PTGER3;PTGER3;PTGER3;PTGER3 | KLK14                              |  |
| PTH1R                                                                 | KLK14;KLK14                        |  |
| PTH2R                                                                 | KLKB1                              |  |
| PTPRB;PTPRB                                                           | KLKBL4                             |  |
| PTPRD;PTPRD                                                           | KLRB1                              |  |
| PTPRN2;PTPRN2;PTPRN2                                                  | KLRC1;KLRC1                        |  |
| PTPRO;PTPRO                                                           | KLRC1;KLRC1;KLRC1;KLRC1            |  |
| PTPRR;PTPRR                                                           | KRAS;KRAS                          |  |
| PUM1;PUM1                                                             | KRBA1                              |  |
| PURG;PURG;PURG;WRN                                                    | KRT2                               |  |
| PWRN2                                                                 | KRT24;KRT24                        |  |
| PXDN                                                                  | KRT26                              |  |
| PXK                                                                   | KRT32                              |  |
| R3HDM2                                                                | KRT37                              |  |
| RAB3B                                                                 | KRT73                              |  |
| RAB3C                                                                 | KRT74                              |  |
| RAB40A                                                                | KRT77                              |  |
| RAB41                                                                 | KRTAP4-12;KRTAP4-12                |  |
| RAD51L1;RAD51L1;RAD51L1                                               | KRTAP4-4                           |  |
| RADIL                                                                 | KRTAP6-2                           |  |

|                               |                                         |  |
|-------------------------------|-----------------------------------------|--|
| RALGAPA1;RALGAPA1             | KRTAP6-3                                |  |
| RALGDS                        | KRTAP7-1                                |  |
| RALYL;RALYL;RALYL             | KSR1                                    |  |
| RAP2B;RAP2B                   | KSR2                                    |  |
| RAPGEF5                       | KTN1;KTN1;KTN1;KTN1                     |  |
| RASA3                         | KY                                      |  |
| RASGRF1;RASGRF1               | KYNU;KYNU                               |  |
| RASGRF2                       | L3MBTL4                                 |  |
| RAX                           | LACRT                                   |  |
| RB1                           | LAMA2;LAMA2                             |  |
| RBM20                         | LAMB3;LAMB3;LAMB3                       |  |
| RBM26                         | LAMC3                                   |  |
| RBM43                         | LARP1                                   |  |
| RBMX;RBMX;RBMX;RBMX           | LBH                                     |  |
| RBMXL2                        | LBH;LBH                                 |  |
| RCHY1;RCHY1;RCHY1             | LBP                                     |  |
| REG1A                         | LCE1D                                   |  |
| RELL1                         | LCK                                     |  |
| REXO1L2P                      | LCN1                                    |  |
| RFPL1S;RFPL1;RFPL1            | LCP1                                    |  |
| RFPL2;RFPL2;RFPL2;RFPL2;RFPL2 | LDB2;LDB2                               |  |
| RFPL3;RFPL3                   | LDHAL6B;MYO1E                           |  |
| RFX4;RFX4                     | LDLRAD1                                 |  |
| RGL1                          | LECT1;LECT1                             |  |
| RGS12;RGS12;RGS12             | LEKR1                                   |  |
| RGS20                         | LETM1                                   |  |
| RGS6                          | LFNG;LFNG                               |  |
| RGS7                          | LGALS12;LGALS12;LGALS12;LGALS12;LGALS12 |  |
| RGSL1                         | LGI1                                    |  |
| RHO                           | LGR5                                    |  |
| RIBC1;RIBC1                   | LGR6;LGR6;LGR6                          |  |
| RIC3;RIC3                     | LHFPL1                                  |  |
| RICH2                         | LHFPL3;LHFPL3                           |  |
| RIMBP2                        | LHX4                                    |  |
| RIPPLY2                       | LHX6;LHX6                               |  |
| RLF                           | LHX8                                    |  |
| RNASE13                       | LIG3;LIG3                               |  |
| RNF128;RNF128                 | LIMA1;LIMA1;LIMA1                       |  |
| RNF150                        | LIMS2                                   |  |
| RNF166                        | LIMS2;LIMS2;LIMS2;LIMS2                 |  |
| RNF43                         | LINGO4                                  |  |
| RNFT2;RNFT2                   | LIPJ                                    |  |
| RNLS;RNLS                     | LMF1                                    |  |
| RNU5E;RNU5D                   | LMO2;LMO2;LMO2                          |  |
| ROBO1                         | LMO3;LMO3                               |  |
| ROBO1;ROBO1;ROBO1;ROBO1       | LMX1A                                   |  |
| ROBO2;ROBO2                   | LOC100128811;GPR158                     |  |

|                          |                                                   |  |
|--------------------------|---------------------------------------------------|--|
| ROBO4                    | LOC100128977;IMP5                                 |  |
| RORA                     | LOC100130872-SPON2;SPON2;SPON2                    |  |
| RPH3AL                   | LOC100132354                                      |  |
| RPLPOP2                  | LOC100132831                                      |  |
| RPS6KA2                  | LOC100133331                                      |  |
| RPS6KA2;RPS6KA2          | LOC100133469                                      |  |
| RPS6KA3                  | LOC100133545                                      |  |
| RPTOR;RPTOR              | LOC100133612                                      |  |
| RSAD2                    | LOC100188947                                      |  |
| RSPO2                    | LOC100188949                                      |  |
| RTF1                     | LOC100216001                                      |  |
| RTL1;MIR431;MIR433       | LOC100240726                                      |  |
| RTN1;RTN1                | LOC100287718                                      |  |
| RTN1;RTN1;RTN1           | LOC100287834;LOC100287704                         |  |
| RUNX3                    | LOC100289673                                      |  |
| RYR1;RYR1                | LOC100303728                                      |  |
| RYR2                     | LOC100303728;SLC25A5                              |  |
| RYR3                     | LOC145820;LOC145820                               |  |
| S100Z                    | LOC145837                                         |  |
| SAFB2                    | LOC145845                                         |  |
| SALL1;SALL1              | LOC150568                                         |  |
| SAMD3                    | LOC150622                                         |  |
| SAMD4A;SAMD4A;SAMD4A     | LOC153328                                         |  |
| SART1                    | LOC220429                                         |  |
| SAV1                     | LOC255025                                         |  |
| SBNO2                    | LOC255411;LOC255411                               |  |
| SCG3;SCG3                | LOC283070                                         |  |
| SCGN;SCGN                | LOC284009;METT10D                                 |  |
| SCIN;SCIN                | LOC284232                                         |  |
| SCNN1D;SCNN1D            | LOC284661                                         |  |
| SCOC;SCOC;SCOC;SCOC;SCOC | LOC284688                                         |  |
| SDK1                     | LOC284798;LOC284798;LOC284798                     |  |
| SDK1;SDK1                | LOC285205                                         |  |
| SDK2                     | LOC285692                                         |  |
| SEMA3E                   | LOC285733                                         |  |
| SERPINB11                | LOC285768;LOC285768                               |  |
| SERPINB12                | LOC285830;LOC285830                               |  |
| SERPINI2                 | LOC339524;LOC339524;LOC339524;LOC339524;LOC339524 |  |
| SEZ6L                    | LOC387646                                         |  |
| SFMBT2                   | LOC388387                                         |  |
| SFTA2                    | LOC388428                                         |  |
| SFTP A2                  | LOC399959;MIR100                                  |  |
| SGCD;SGCD;SGCD           | LOC400759                                         |  |
| SGCD;SGCD;SGCD;SGCD;SGCD | LOC401463                                         |  |
| SGEF                     | LOC407835                                         |  |
| SGPP2                    | LOC441089                                         |  |
| SH2D1A;SH2D1A            | LOC441601                                         |  |

|                                         |                                                   |  |
|-----------------------------------------|---------------------------------------------------|--|
| SH3PXD2B                                | LOC441897                                         |  |
| SHANK2                                  | LOC442293                                         |  |
| SHANK2;SHANK2                           | LOC493754                                         |  |
| SHC4                                    | LOC494141;LOC494141                               |  |
| SHISA3                                  | LOC642597                                         |  |
| SHISA6                                  | LOC644649                                         |  |
| SHROOM2                                 | LOC646627                                         |  |
| SHROOM4;SHROOM4                         | LOC646982;LOC646982;LOC646982                     |  |
| SIGLEC12;SIGLEC12                       | LOC728723;ZBED3                                   |  |
| SIGLEC14                                | LOC90246                                          |  |
| SIP1;SIP1;SIP1                          | LONP1                                             |  |
| SIRT3;SIRT3                             | LOXL1                                             |  |
| SLAMF1;SLAMF1                           | LPAR1;LPAR1                                       |  |
| SLC10A1                                 | LPAR4                                             |  |
| SLC12A7                                 | LPHN2                                             |  |
| SLC13A3;SLC13A3                         | LPL                                               |  |
| SLC17A4                                 | LPPR1                                             |  |
| SLC17A6                                 | LPPR1;LPPR1                                       |  |
| SLC1A7;SLC1A7                           | LRCH2                                             |  |
| SLC22A13                                | LRFN1                                             |  |
| SLC22A2                                 | LRIT1                                             |  |
| SLC25A14;SLC25A14                       | LRP12;LRP12                                       |  |
| SLC25A18                                | LRP1B                                             |  |
| SLC26A3                                 | LRRC10                                            |  |
| SLC26A5;SLC26A5;SLC26A5;SLC26A5;SLC26A5 | LRRC27;LRRC27;LRRC27;LRRC27;LRRC27                |  |
| SLC2A2                                  | LRRC2;TDGF1                                       |  |
| SLC2A3                                  | LRRC32;LRRC32                                     |  |
| SLC2A7                                  | LRRC3B                                            |  |
| SLC35F1                                 | LRRC4C                                            |  |
| SLC38A10;SLC38A10                       | LRRC4C;LRRC4C                                     |  |
| SLC38A5                                 | LRRC52;LOC400794                                  |  |
| SLC44A2                                 | LRRC6                                             |  |
| SLC45A2;SLC45A2                         | LRRC67                                            |  |
| SLC4A10                                 | LRRIQ3                                            |  |
| SLC5A12                                 | LRRK1                                             |  |
| SLC5A4                                  | LRRK2                                             |  |
| SLC5A7                                  | LRRN1                                             |  |
| SLC6A1                                  | LRRN2;LRRN2                                       |  |
| SLC6A19                                 | LRTM1;CACNA2D3;LRTM1                              |  |
| SLC7A3;SLC7A3                           | LRTM2;LRTM2;CACNA2D4;LRTM2                        |  |
| SLC7A4                                  | LRTOMT;LRTOMT;LRTOMT;LRTOMT;LRTOMT;LRTOMT         |  |
| SLC8A1;SLC8A1;SLC8A1;SLC8A1             | LST1;LST1;LST1;LST1;LST1;LST1;LST1;LST1;LST1;LST1 |  |
| SLCO3A1;SLCO3A1                         | LTA;LTA                                           |  |
| SLCO5A1;SLCO5A1;SLCO5A1                 | LUZP2                                             |  |
| SLIT3                                   | LVRN                                              |  |
| SLITRK2;SLITRK2;SLITRK2;SLITRK2         | LY6G6F                                            |  |
| SLITRK4                                 | LY9;LY9                                           |  |

|                                                         |                                     |  |
|---------------------------------------------------------|-------------------------------------|--|
| SMARCA2;SMARCA2                                         | LYG1                                |  |
| SMARCC1                                                 | LYPD5;LYPD5                         |  |
| SMEK3P                                                  | LYPD6B                              |  |
| SMO                                                     | LYRM4;LYRM4                         |  |
| SMOC2;SMOC2                                             | LYSMD2;LYSMD2                       |  |
| SMYD3;SMYD3                                             | LYZL2                               |  |
| SNORD113-4                                              | LZTF1                               |  |
| SNORD115-15;SNORD115-21;SNORD115-34                     | MAB21L1;MIR548F5;NBEA;MAB21L1       |  |
| SNORD115-6                                              | MACROD2;MACROD2                     |  |
| SNORD115-9;SNORD115-12;SNORD115-10;SNORD115-5           | MAD1L1;MAD1L1;MAD1L1                |  |
| SNORD116-26                                             | MAF;MAF;MAF                         |  |
| SNRPN;SNURF;SNRPN;SNRPN;SNRPN;SNURF;SNRPN               | MAGEA10;MAGEA10                     |  |
| SNTG2                                                   | MAGEA5                              |  |
| SNX20;SNX20                                             | MAGEC3                              |  |
| SOD3                                                    | MAGED2;MAGED2                       |  |
| SORBS1;SORBS1;SORBS1;SORBS1;SORBS1;SORBS1;SORBS1        | MAGEE1                              |  |
| SORBS2;SORBS2;SORBS2;SORBS2;SORBS2;SORBS2;SORBS2;SORBS2 | MAGEE2                              |  |
| SORCS1;SORCS1                                           | MAGI2                               |  |
| SORCS2                                                  | MAL;MAL;MAL;MAL                     |  |
| SORCS3                                                  | MALL                                |  |
| SORL1                                                   | MAML2                               |  |
| SOST                                                    | MAML3                               |  |
| SOX11                                                   | MAN2B2                              |  |
| SOX2OT                                                  | MAP2K5;MAP2K5                       |  |
| SOX30;SOX30                                             | MAP3K10                             |  |
| SOX5                                                    | MAPK4                               |  |
| SP110;SP110;SP110                                       | MAPRE2;MAPRE2;MAPRE2;MAPRE2         |  |
| SPANXC;SPANXC                                           | MARCH1;MARCH1                       |  |
| SPATA13;SPATA13                                         | MARK1                               |  |
| SPCS3                                                   | MASP1;MASP1;MASP1;MASP1;MASP1;MASP1 |  |
| SPEM1                                                   | MAST4;MAST4;MAST4                   |  |
| SPERT                                                   | MATN4;RBPJL;MATN4;MATN4             |  |
| SPN;SPN                                                 | MB;MB;MB                            |  |
| SPNS1;SPNS1;SPNS1;SPNS1;SPNS1                           | MBNL3;MBNL3;MBNL3                   |  |
| SPOCK3;SPOCK3                                           | MBTPS2                              |  |
| SPON1                                                   | MC2R                                |  |
| SPOPL                                                   | MCART6                              |  |
| SPRR2C                                                  | MCF2L2                              |  |
| SPSB4                                                   | MCF2L;MCF2L                         |  |
| SRBD1                                                   | MCHR2;MCHR2                         |  |
| ST5;ST5;ST5                                             | MCTP1                               |  |
| ST6GALNAC1                                              | MDGA1                               |  |
| ST6GALNAC3                                              | MDGA2;MDGA2                         |  |
| ST6GALNAC5                                              | MDP1                                |  |
| ST8SIA2                                                 | MED12L;P2RY14;P2RY14                |  |

|                         |                                              |  |
|-------------------------|----------------------------------------------|--|
| ST8SIA5                 | MEF2C                                        |  |
| STAB2                   | MEF2C;MEF2C                                  |  |
| STK10                   | MEG8                                         |  |
| STK17B                  | MEGF10                                       |  |
| STK32B                  | MEGF10;MEGF10                                |  |
| STK32C                  | MEGF6                                        |  |
| STS                     | MEGF6;MIR551A                                |  |
| STXBP6                  | MEI1                                         |  |
| SUCLG1                  | MEOX1;MEOX1;MEOX1                            |  |
| SV2C                    | MEOX2                                        |  |
| SYCP2L                  | MEPE                                         |  |
| SYK;SYK;SYK;SYK         | METTL11B                                     |  |
| SYN1;SYN1               | MFHAS1                                       |  |
| SYNPR                   | MFSD8;C4orf29                                |  |
| SYT3;SYT3               | MGAM                                         |  |
| SYT3;SYT3;SYT3          | MGAT5B                                       |  |
| SYT7                    | MGC23270                                     |  |
| SYTL5;SYTL5;SYTL5       | MGC26597                                     |  |
| T                       | MGLL;MGLL                                    |  |
| TAAR6                   | MGMT                                         |  |
| TACC2;TACC2;TACC2;TACC2 | MIB2;MIB2;MIB2;MIB2;MIB2;MIB2                |  |
| TAGAP;TAGAP;TAGAP       | MICA                                         |  |
| TARSL2                  | MICB                                         |  |
| TAS2R1                  | MICB;MICB                                    |  |
| TAS2R40                 | MIIMT1;PEG3;PEG3;ZIM2;PEG3;PEG3;ZIM2;ZIM2    |  |
| TBC1D16                 | MINA;MINA;MINA                               |  |
| TBCD                    | MIR10B                                       |  |
| TBX15                   | MIR124-2                                     |  |
| TBX3;TBX3               | MIR1256;H2BFM                                |  |
| TCEAL8;TCEAL8           | MIR1258;ZNF385B                              |  |
| TCERG1L                 | MIR1260;NGB                                  |  |
| TCF7L1                  | MIR127;RTL1                                  |  |
| TECTA                   | MIR128-2;ARPP-21                             |  |
| TERT;TERT               | MIR1295;FMO3;FMO3                            |  |
| TEX19                   | MIR206                                       |  |
| TFAP2B                  | MIR20B;MIR363;MIR106A;MIR18B;MIR19B2;MIR92A2 |  |
| TFAP2D                  | MIR223                                       |  |
| TFAP2D;TFAP2D           | MIR29C                                       |  |
| TFCP2L1                 | MIR369;MIR410;MIR412;MIR656                  |  |
| TFF2                    | MIR376B;MIR654;MIR300;MIR376A1               |  |
| TFF3                    | MIR410;MIR412;MIR369;MIR656                  |  |
| TFPI2                   | MIR492                                       |  |
| TGIF2LX                 | MIR495                                       |  |
| TGM3                    | MIR502;CLCN5;CLCN5;MIR660                    |  |
| THADA;THADA             | MIR548A2                                     |  |
| THSD4                   | MIR548F1                                     |  |
| THSD7A                  | MIR548F5;NBEA                                |  |



|                          |                                             |  |
|--------------------------|---------------------------------------------|--|
| TIAM2;TIAM2              | MIR557                                      |  |
| TIE1                     | MIR609;C10orf79                             |  |
| TLN1                     | MKLN1                                       |  |
| TM6SF1;TM6SF1            | MLLT3                                       |  |
| TMC2                     | MLLT6                                       |  |
| TMEFF2                   | MMP13                                       |  |
| TMEM108;TMEM108          | MMP21                                       |  |
| TMEM132B                 | MMP28                                       |  |
| TMEM132E                 | MMP28;MMP28                                 |  |
| TMEM154                  | MOBP;MOBP                                   |  |
| TMEM163                  | MOG;MOG;MOG;MOG;MOG;MOG;MOG;MOG;MOG;MOG;MOG |  |
| TMEM202                  | MORC1                                       |  |
| TMEM211                  | MORF4                                       |  |
| TMEM225                  | MORN1                                       |  |
| TMEM232                  | MOS                                         |  |
| TMEM233                  | MPPED2                                      |  |
| TMEM47                   | MPZL1;MPZL1;MPZL1                           |  |
| TMEM71;TMEM71            | MR1                                         |  |
| TMEM79;TMEM79            | MRC2                                        |  |
| TMIE                     | MRGPRE                                      |  |
| TMPRSS2;TMPRSS2          | MRGPRF;MRGPRF                               |  |
| TMPRSS3;TMPRSS3;TMPRSS3  | MRGPRX2                                     |  |
| TMPRSS8                  | MRPS21;MRPS21                               |  |
| TNFRSF13B                | MRPS28                                      |  |
| TNFSF8                   | MRPS6;SLC5A3                                |  |
| TNNI3;TNNI3              | MS4A13;MS4A13;MS4A13;MS4A13                 |  |
| TNR                      | MS4A14;MS4A14;MS4A14;MS4A14                 |  |
| TNRC6C;TNRC6C            | MS4A15;MS4A15                               |  |
| TNS1                     | MS4A7;MS4A7;MS4A7;MS4A7                     |  |
| TNXB                     | MSI1                                        |  |
| TOLLIP                   | MSRB3;MSRB3                                 |  |
| TP53I11;TP53I11          | MTERFD2;MTERFD2;MTERFD2;MTERFD2             |  |
| TPH1                     | MTNR1B                                      |  |
| TPH2                     | MTUS2                                       |  |
| TPO;TPO;TPO;TPO          | MTUS2;MTUS2                                 |  |
| TPPP2                    | MTX3;MTX3                                   |  |
| TPTE2;TPTE2;TPTE2        | MUC13                                       |  |
| TRAPPC9                  | MUC2                                        |  |
| TRAPPC9;TRAPPC9          | MUC20;MUC20                                 |  |
| TRHR                     | MUC21;MUC21                                 |  |
| TRIM15                   | MUC4;MUC4;MUC4                              |  |
| TRIM43B                  | MUC5B                                       |  |
| TRIM63                   | MUC7;MUC7;MUC7                              |  |
| TRIM6;TRIM6-TRIM34;TRIM6 | MUSK;MUSK;MUSK                              |  |
| TRIM71                   | MX1;MX1                                     |  |
| TRIM77                   | MXRA5                                       |  |



|                                |                                                                       |  |
|--------------------------------|-----------------------------------------------------------------------|--|
| WDR88                          | NEDD4L;NEDD4L;NEDD4L;NEDD4L;NEDD4L;NEDD4L;NEDD4L;NEDD4L;NEDD4L;NEDD4L |  |
| WFDC3;DNNTIP1                  | NEFL                                                                  |  |
| WFDC8;WFDC8                    | NEGR1                                                                 |  |
| WFDC9                          | NEK1                                                                  |  |
| WFS1;WFS1                      | NEK11;NEK11                                                           |  |
| WNK2                           | NELL1;NELL1                                                           |  |
| WNT11                          | NEO1                                                                  |  |
| WNT5A                          | NET1;NET1                                                             |  |
| WNT7A                          | NEUROD1                                                               |  |
| WNT8A                          | NEUROD2                                                               |  |
| WSCD2                          | NEUROD4                                                               |  |
| WWP2;WWP2                      | NF1;NF1                                                               |  |
| XAB2;LOC100131801;LOC100131801 | NFASC;NFASC;NFASC;NFASC                                               |  |
| XAF1;XAF1                      | NFASC;NFASC;NFASC;NFASC;NFASC                                         |  |
| XAGE5                          | NFATC1;NFATC1;NFATC1;NFATC1;NFATC1                                    |  |
| XCL1                           | NFATC2                                                                |  |
| XIRP2;XIRP2                    | NGEF;NGEF                                                             |  |
| XKR4                           | NGF                                                                   |  |
| XKR6;MIR598                    | NHLRC3;NHLRC3                                                         |  |
| XKR7                           | NHS                                                                   |  |
| XKR7;XKR7                      | NID2                                                                  |  |
| XKRX                           | NIN;NIN;NIN                                                           |  |
| YPEL2                          | NKAIN3                                                                |  |
| ZAP70                          | NKAIN4                                                                |  |
| ZBBX                           | NKD1                                                                  |  |
| ZBTB16;ZBTB16                  | NKX2-3                                                                |  |
| ZCCHC13                        | NKX2-4                                                                |  |
| ZCCHC16                        | NLGN1                                                                 |  |
| ZCCHC5                         | NLRP14;ZNF214;NLRP14                                                  |  |
| ZDHHC15;ZDHHC15;ZDHHC15        | NME5                                                                  |  |
| ZDHHC2                         | NMNAT1                                                                |  |
| ZEB2;ZEB2                      | NMUR1                                                                 |  |
| ZFATAS;ZFAT;ZFAT;ZFAT          | NOD2                                                                  |  |
| ZFHX4                          | NOG;NOG                                                               |  |
| ZFP2                           | NOL4                                                                  |  |
| ZFP82                          | NOTCH4                                                                |  |
| ZFPM2                          | NOX1;NOX1                                                             |  |
| ZFYVE28                        | NOX3                                                                  |  |
| ZIC1                           | NOX4;NOX4;NOX4;NOX4                                                   |  |
| ZMAT4;ZMAT4                    | NPFFR2;NPFFR2;NPFFR2                                                  |  |
| ZNF177;ZNF177                  | NPHP4                                                                 |  |
| ZNF185                         | NPHS2                                                                 |  |
| ZNF20                          | NPR2                                                                  |  |
| ZNF251                         | NPTX1                                                                 |  |
| ZNF281                         | NPY6R                                                                 |  |
| ZNF302;ZNF302                  | NR112;NR112;NR112                                                     |  |



|  |                      |  |
|--|----------------------|--|
|  | OR10C1               |  |
|  | OR10G2               |  |
|  | OR10K2               |  |
|  | OR11A1               |  |
|  | OR11G2               |  |
|  | OR12D2               |  |
|  | OR13A1               |  |
|  | OR13C4               |  |
|  | OR2A2                |  |
|  | OR2AK2;OR2L13        |  |
|  | OR2B2                |  |
|  | OR2G3                |  |
|  | OR2H1                |  |
|  | OR2J2;OR2J2          |  |
|  | OR2L13;OR2L13        |  |
|  | OR2L1P;OR2L13        |  |
|  | OR2T11               |  |
|  | OR4E2                |  |
|  | OR4F6                |  |
|  | OR4N4                |  |
|  | OR51L1               |  |
|  | OR52B4               |  |
|  | OR52J3               |  |
|  | OR5A2                |  |
|  | OR5AS1               |  |
|  | OR5D18               |  |
|  | OR5I1                |  |
|  | OR5L2                |  |
|  | OR5T3                |  |
|  | OR5V1                |  |
|  | OR5W2                |  |
|  | OR6C1                |  |
|  | OR6V1                |  |
|  | OR8B12               |  |
|  | OR8H1                |  |
|  | OR8K1                |  |
|  | OR8K5                |  |
|  | OR8U8;OR5M11         |  |
|  | OR9Q2                |  |
|  | OSBPL5;OSBPL5;OSBPL5 |  |
|  | OSBPL6               |  |
|  | OSTM1                |  |
|  | OTOP3                |  |
|  | OTP                  |  |
|  | OTUD7A               |  |
|  | OTX2                 |  |
|  | OTX2;OTX2            |  |

|  |                                                 |  |
|--|-------------------------------------------------|--|
|  | OVCH1                                           |  |
|  | OXER1                                           |  |
|  | OXGR1                                           |  |
|  | OXNAD1                                          |  |
|  | P11                                             |  |
|  | P2RX5;P2RX5;P2RX5                               |  |
|  | P704P                                           |  |
|  | PABPC1L                                         |  |
|  | PACRG;PACRG;PACRG                               |  |
|  | PAGE1                                           |  |
|  | PAGE2                                           |  |
|  | PAGE3                                           |  |
|  | PAGE5;PAGE5;PAGE5;PAGE5                         |  |
|  | PAK7;PAK7                                       |  |
|  | PALLD;PALLD;PALLD                               |  |
|  | PALM2;PALM2                                     |  |
|  | PALM;PALM                                       |  |
|  | PAM;PAM;PAM;PAM                                 |  |
|  | PAMR1;PAMR1                                     |  |
|  | PANX1                                           |  |
|  | PANX3                                           |  |
|  | PAOX;PAOX;PAOX                                  |  |
|  | PAPOLB;RADIL;PAPOLB                             |  |
|  | PAPOLG                                          |  |
|  | PAQR8                                           |  |
|  | PAR-SN;SNORD107                                 |  |
|  | PAR5;SNORD64                                    |  |
|  | PARD3B;PARD3B;PARD3B                            |  |
|  | PARD6G                                          |  |
|  | PARK2;PARK2;PARK2                               |  |
|  | PART1                                           |  |
|  | PARVG;PARVG;PARVG;PARVG;PARVG;PARVG;PARVG       |  |
|  | PATL2                                           |  |
|  | PAX1                                            |  |
|  | PAX2;PAX2;PAX2;PAX2;PAX2                        |  |
|  | PAX3;PAX3;PAX3;CCDC140;PAX3;PAX3;PAX3;PAX3;PAX3 |  |
|  | PAX3;PAX3;PAX3;PAX3;PAX3;CCDC140;PAX3;PAX3;PAX3 |  |
|  | PAX3;PAX3;PAX3;PAX3;PAX3;PAX3                   |  |
|  | PAX3;PAX3;PAX3;PAX3;PAX3;PAX3;PAX3;PAX3         |  |
|  | PAX3;PAX3;PAX3;PAX3;PAX3;PAX3;PAX3;CCDC140      |  |
|  | PAX5                                            |  |
|  | PAX6                                            |  |
|  | PAX6;PAX6;PAX6                                  |  |
|  | PAX7;PAX7;PAX7                                  |  |
|  | PAX9                                            |  |
|  | PBX1                                            |  |
|  | PCBP3;PCBP3                                     |  |



|  |                               |  |
|--|-------------------------------|--|
|  | PCYOX1                        |  |
|  | PDE10A;PDE10A                 |  |
|  | PDE11A;PDE11A                 |  |
|  | PDE11A;PDE11A;PDE11A          |  |
|  | PDE3B;PSMA1;PDE3B             |  |
|  | PDE3B;PSMA1;PSMA1             |  |
|  | PDE4A;PDE4A                   |  |
|  | PDE4B;PDE4B                   |  |
|  | PDE4D;PDE4D;PDE4D             |  |
|  | PDE4DIP                       |  |
|  | PDE4DIP;PDE4DIP               |  |
|  | PDE6B;PDE6B;PDE6B             |  |
|  | PDE7B                         |  |
|  | PDE8B;PDE8B;PDE8B;PDE8B;PDE8B |  |
|  | PDGFRA                        |  |
|  | PDGFRB                        |  |
|  | PDHA1                         |  |
|  | PDLIM1                        |  |
|  | PDPN;PDPN;PDPN;PDPN           |  |
|  | PDX1                          |  |
|  | PDZD2                         |  |
|  | PEMT;PEMT;PEMT                |  |
|  | PET117                        |  |
|  | PEX14                         |  |
|  | PEX26;PEX26                   |  |
|  | PEX7                          |  |
|  | PGCP                          |  |
|  | PGLYRP2                       |  |
|  | PGLYRP3                       |  |
|  | PGR                           |  |
|  | PHACTR1                       |  |
|  | PHC2                          |  |
|  | PHYHIPL;PHYHIPL               |  |
|  | PIK3CD                        |  |
|  | PIK3R6                        |  |
|  | PILRA;PILRA;PILRA             |  |
|  | PIP                           |  |
|  | PIP5K1C                       |  |
|  | PITPNC1;PITPNC1               |  |
|  | PITX2;PITX2                   |  |
|  | PIWIL3                        |  |
|  | PIWIL4                        |  |
|  | PKD1L1                        |  |
|  | PKDCC                         |  |
|  | PKHD1;PKHD1                   |  |
|  | PKM2;PKM2;PKM2                |  |
|  | PKN1                          |  |



|  |                                           |  |
|--|-------------------------------------------|--|
|  | PKNOX2                                    |  |
|  | PKP4;CCDC148;PKP4;CCDC148                 |  |
|  | PLA2G16;PLA2G16                           |  |
|  | PLA2G2A;PLA2G2A;PLA2G2A;PLA2G2A           |  |
|  | PLA2G4A                                   |  |
|  | PLA2G5                                    |  |
|  | PLAC8;PLAC8                               |  |
|  | PLAC8;PLAC8;PLAC8;PLAC8                   |  |
|  | PLB1;PLB1                                 |  |
|  | PLBD1                                     |  |
|  | PLCG2                                     |  |
|  | PLCH1;PLCH1;PLCH1                         |  |
|  | PLCZ1;CAPZA3                              |  |
|  | PLD1;PLD1                                 |  |
|  | PLD4                                      |  |
|  | PLEKHG4B                                  |  |
|  | PLEKHG5;PLEKHG5;PLEKHG5;PLEKHG5           |  |
|  | PLEKHM3                                   |  |
|  | PLEKHO2                                   |  |
|  | PLG;PLG                                   |  |
|  | PLP1                                      |  |
|  | PLP1;PLP1;PLP1                            |  |
|  | PLP1;PLP1;PLP1;PLP1                       |  |
|  | PLXNA4                                    |  |
|  | PLXND1                                    |  |
|  | PMS1;PMS1;PMS1                            |  |
|  | PNLDC1                                    |  |
|  | PNMA2                                     |  |
|  | PNMAL2                                    |  |
|  | PNPLA1;PNPLA1                             |  |
|  | PNPLA1;PNPLA1;PNPLA1                      |  |
|  | PODN                                      |  |
|  | PODXL2                                    |  |
|  | POM121L1P                                 |  |
|  | POMC;POMC                                 |  |
|  | PON1                                      |  |
|  | PORCN;PORCN;PORCN;PORCN;PORCN             |  |
|  | PORCN;PORCN;PORCN;PORCN;PORCN;PORCN;PORCN |  |
|  | POTED                                     |  |
|  | POTEF                                     |  |
|  | POTEH                                     |  |
|  | POU2AF1                                   |  |
|  | POU3F2                                    |  |
|  | POU4F1                                    |  |
|  | POU5F1                                    |  |
|  | POU6F2;POU6F2                             |  |
|  | PPAN-P2RY11;PPAN;SNORD105B                |  |

|  |                                                 |  |
|--|-------------------------------------------------|--|
|  | PPEF2                                           |  |
|  | PPFIA2                                          |  |
|  | PPFIA4                                          |  |
|  | PPM1A                                           |  |
|  | PPM1H                                           |  |
|  | PPM1L                                           |  |
|  | PPP1R16B                                        |  |
|  | PPP1R2                                          |  |
|  | PPP1R2P1                                        |  |
|  | PPP1R8;PPP1R8;PPP1R8                            |  |
|  | PPP2R2B;PPP2R2B                                 |  |
|  | PRDM11                                          |  |
|  | PRDM13                                          |  |
|  | PRDM15;PRDM15                                   |  |
|  | PRDM16;PRDM16                                   |  |
|  | PRDM2;PRDM2                                     |  |
|  | PRDM6                                           |  |
|  | PRDM8;PRDM8                                     |  |
|  | PRELP;PRELP                                     |  |
|  | PRF1;PRF1                                       |  |
|  | PRIMA1                                          |  |
|  | PRKAG2                                          |  |
|  | PRKAG2;PRKAG2                                   |  |
|  | PRKAG2;PRKAG2;PRKAG2                            |  |
|  | PRKAR1B;PRKAR1B;PRKAR1B;PRKAR1B;PRKAR1B;PRKAR1B |  |
|  | PRKAR2B                                         |  |
|  | PRKCE                                           |  |
|  | PRKCZ;PRKCZ;PRKCZ                               |  |
|  | PRKG1;PRKG1                                     |  |
|  | PRL;PRL                                         |  |
|  | PRLR                                            |  |
|  | PRMT8                                           |  |
|  | PRO1768;FOXN3                                   |  |
|  | PRPH                                            |  |
|  | PRR23B                                          |  |
|  | PRR5L                                           |  |
|  | PRR5L;PRR5L;PRR5L;PRR5L                         |  |
|  | PRRT1                                           |  |
|  | PRRT4                                           |  |
|  | PRRX1;PRRX1                                     |  |
|  | PRSS21;PRSS21;PRSS21                            |  |
|  | PRUNE2                                          |  |
|  | PSD4;LOC440839                                  |  |
|  | PSKH2                                           |  |
|  | PSMB2                                           |  |
|  | PSMB9;PSMB9                                     |  |
|  | PSTPIP1;PSTPIP1                                 |  |

|  |                                                                           |  |
|--|---------------------------------------------------------------------------|--|
|  | PSTPIP2                                                                   |  |
|  | PTCH1;PTCH1;PTCH1;PTCH1;PTCH1;PTCH1;PTCH1                                 |  |
|  | PTF1A                                                                     |  |
|  | PTGER1                                                                    |  |
|  | PTGER3;PTGER3;PTGER3;PTGER3;PTGER3;PTGER3;PTGER3;PTGER3;<br>PTGER3;PTGER3 |  |
|  | PTGS1;PTGS1                                                               |  |
|  | PTH1R                                                                     |  |
|  | PTPN3;PTPN3;PTPN3;PTPN3;PTPN3;PTPN3                                       |  |
|  | PTPN7                                                                     |  |
|  | PTPRE                                                                     |  |
|  | PTPRN2;PTPRN2;PTPRN2                                                      |  |
|  | PTPRO;PTPRO                                                               |  |
|  | PTPRR                                                                     |  |
|  | PURG;WRN;PURG                                                             |  |
|  | PVRL1;PVRL1                                                               |  |
|  | PXDNL                                                                     |  |
|  | ProSAPiP1                                                                 |  |
|  | ProSAPiP1;ProSAPiP1                                                       |  |
|  | R3HDM2                                                                    |  |
|  | RAB27A;RAB27A                                                             |  |
|  | RAB3A                                                                     |  |
|  | RAB40A                                                                    |  |
|  | RAB6B                                                                     |  |
|  | RAC2                                                                      |  |
|  | RADIL                                                                     |  |
|  | RALYL;RALYL;RALYL;RALYL                                                   |  |
|  | RAMP1                                                                     |  |
|  | RAP2B;RAP2B                                                               |  |
|  | RAPGEF5                                                                   |  |
|  | RARB;RARB                                                                 |  |
|  | RASA3                                                                     |  |
|  | RASAL3                                                                    |  |
|  | RASGEF1C                                                                  |  |
|  | RASGRF2                                                                   |  |
|  | RASGRF2;RNU5E;RNU5D                                                       |  |
|  | RASL10B                                                                   |  |
|  | RASSF2;RASSF2                                                             |  |
|  | RASSF3                                                                    |  |
|  | RASSF4                                                                    |  |
|  | RAX                                                                       |  |
|  | RBM11                                                                     |  |
|  | RBM20                                                                     |  |
|  | RBM3                                                                      |  |
|  | RBM46                                                                     |  |
|  | RBP7                                                                      |  |
|  | RCAN2                                                                     |  |

|  |                             |  |
|--|-----------------------------|--|
|  | RCN1                        |  |
|  | RCSD1                       |  |
|  | RDBP                        |  |
|  | REC8;REC8                   |  |
|  | RELN;RELN                   |  |
|  | RERE;RERE                   |  |
|  | REST                        |  |
|  | REXO1L2P                    |  |
|  | RFC5;RFC5;RFC5;RFC5         |  |
|  | RFPL3;RFPL3                 |  |
|  | RFX4                        |  |
|  | RFX4;RFX4                   |  |
|  | RFX6                        |  |
|  | RFX8                        |  |
|  | RGL1                        |  |
|  | RGNEF                       |  |
|  | RGS1                        |  |
|  | RGS12;RGS12;RGS12           |  |
|  | RGS6                        |  |
|  | RGS7                        |  |
|  | RGS7;RGS7                   |  |
|  | RHBDF2;RHBDF2               |  |
|  | RHD;RHD                     |  |
|  | RHO                         |  |
|  | RIBC1;RIBC1                 |  |
|  | RIC8B                       |  |
|  | RICH2                       |  |
|  | RICS                        |  |
|  | RIMS1                       |  |
|  | RIMS2;RIMS2                 |  |
|  | RIPPLY2                     |  |
|  | RMST;MIR1251                |  |
|  | RNASE11;RNASE12             |  |
|  | RNASE1;RNASE1;RNASE1        |  |
|  | RNASE1;RNASE1;RNASE1;RNASE1 |  |
|  | RNASE7;RNASE7               |  |
|  | RNF128;RNF128               |  |
|  | RNF166                      |  |
|  | RNF180;RNF180               |  |
|  | RNF220                      |  |
|  | RNF5P1                      |  |
|  | RNU5E;RNU5D                 |  |
|  | ROBO1;ROBO1;ROBO1;ROBO1     |  |
|  | ROBO4                       |  |
|  | ROPN1                       |  |
|  | ROPN1L                      |  |
|  | ROR2                        |  |

|                                     |  |
|-------------------------------------|--|
| RORA                                |  |
| RPH3AL                              |  |
| RPL7                                |  |
| RPS24;RPS24;RPS24;RPS24;RPS24;RPS24 |  |
| RPS29;RPS29                         |  |
| RPS5                                |  |
| RPS6KA2                             |  |
| RPS6KA2;RPS6KA2                     |  |
| RSAD2                               |  |
| RSPH10B;RSPH10B2                    |  |
| RSPO2                               |  |
| RTN1;RTN1                           |  |
| RTN4IP1                             |  |
| RTP2;RTP2                           |  |
| RTP3                                |  |
| RTP4                                |  |
| RUNX1;RUNX1;RUNX1                   |  |
| RUNX1;RUNX1;RUNX1;RUNX1;RUNX1       |  |
| RUNX3;RUNX3                         |  |
| RXFP2;RXFP2                         |  |
| RXFP3                               |  |
| RXRG;RXRG                           |  |
| RYR2                                |  |
| RYR3                                |  |
| S100B                               |  |
| SALL1;SALL1                         |  |
| SALL3                               |  |
| SAMD3                               |  |
| SAMD4A;SAMD4A                       |  |
| SAMD5                               |  |
| SCAND3                              |  |
| SCARA5                              |  |
| SCARF2;SCARF2                       |  |
| SCEL;SCEL;SCEL                      |  |
| SCG2                                |  |
| SCGB3A1                             |  |
| SCGN                                |  |
| SCGN;SCGN                           |  |
| SCHIP1                              |  |
| SCIN;SCIN                           |  |
| SCLT1;C4orf33;C4orf33               |  |
| SCML4                               |  |
| SCN10A                              |  |
| SCN8A                               |  |
| SCN9A                               |  |
| SCNN1G                              |  |
| SCOC;SCOC;SCOC;SCOC;SCOC            |  |

|  |                      |  |
|--|----------------------|--|
|  | SDC2                 |  |
|  | SDCBP2;SDCBP2        |  |
|  | SDHA                 |  |
|  | SDK1                 |  |
|  | SDK1;SDK1            |  |
|  | SDK2                 |  |
|  | SDR16C5              |  |
|  | SDS;SDS              |  |
|  | SEMA3E               |  |
|  | SEMA5A               |  |
|  | SEMA5B               |  |
|  | SEMA6A               |  |
|  | SEMA6B               |  |
|  | SEMG1                |  |
|  | SEPT3;SEPT3          |  |
|  | SEPT6;SEPT6          |  |
|  | SEPX1                |  |
|  | SERINC5              |  |
|  | SERPINB12            |  |
|  | SERPINB9             |  |
|  | SERPINI2             |  |
|  | SF1;SF1;SF1          |  |
|  | SF3B2                |  |
|  | SFMBT2               |  |
|  | SFRP2                |  |
|  | SFTA3                |  |
|  | SGEF                 |  |
|  | SGIP1                |  |
|  | SGK1                 |  |
|  | SGK2                 |  |
|  | SGPP2                |  |
|  | SH2B3                |  |
|  | SH3BGRL;SH3BGRL;HMG5 |  |
|  | SH3PXD2A             |  |
|  | SH3RF3               |  |
|  | SHANK1               |  |
|  | SHANK2               |  |
|  | SHANK2;SHANK2        |  |
|  | SHISA3               |  |
|  | SHISA9               |  |
|  | SHOC2                |  |
|  | SHROOM2              |  |
|  | SHROOM3;SHROOM3      |  |
|  | SHROOM4;SHROOM4      |  |
|  | SIAH3                |  |
|  | SIDT1;SIDT1          |  |

|  |                                                                             |  |
|--|-----------------------------------------------------------------------------|--|
|  | SIGLEC10;SIGLEC10;SIGLEC10;SIGLEC10;SIGLEC10;SIGLEC10;SIGLEC10;LOC100129083 |  |
|  | SIK1                                                                        |  |
|  | SIK3                                                                        |  |
|  | SIPA1L1                                                                     |  |
|  | SIPA1L2                                                                     |  |
|  | SIX2                                                                        |  |
|  | SIX6                                                                        |  |
|  | SKI                                                                         |  |
|  | SLA2;SLA2                                                                   |  |
|  | SLA;TG;SLA;SLA                                                              |  |
|  | SLAIN1                                                                      |  |
|  | SLAMF9;SLAMF9;SLAMF9                                                        |  |
|  | SLC12A5;SLC12A5;SLC12A5                                                     |  |
|  | SLC12A7                                                                     |  |
|  | SLC12A7;SLC12A7                                                             |  |
|  | SLC13A5;SLC13A5                                                             |  |
|  | SLC15A3;SLC15A3                                                             |  |
|  | SLC16A12                                                                    |  |
|  | SLC16A9                                                                     |  |
|  | SLC17A2                                                                     |  |
|  | SLC17A3;SLC17A3                                                             |  |
|  | SLC17A4                                                                     |  |
|  | SLC17A7                                                                     |  |
|  | SLC17A8;SLC17A8;SLC17A8;SLC17A8                                             |  |
|  | SLC1A2                                                                      |  |
|  | SLC1A7                                                                      |  |
|  | SLC20A2                                                                     |  |
|  | SLC22A15                                                                    |  |
|  | SLC22A2                                                                     |  |
|  | SLC22A8                                                                     |  |
|  | SLC22A9                                                                     |  |
|  | SLC24A1                                                                     |  |
|  | SLC24A4;SLC24A4;SLC24A4                                                     |  |
|  | SLC24A5                                                                     |  |
|  | SLC25A18                                                                    |  |
|  | SLC25A24                                                                    |  |
|  | SLC26A5;SLC26A5;SLC26A5;SLC26A5;SLC26A5                                     |  |
|  | SLC26A9;SLC26A9;SLC26A9                                                     |  |
|  | SLC27A6;SLC27A6                                                             |  |
|  | SLC28A1;SLC28A1                                                             |  |
|  | SLC2A14                                                                     |  |
|  | SLC2A3                                                                      |  |
|  | SLC30A8;SLC30A8                                                             |  |
|  | SLC35F1                                                                     |  |
|  | SLC36A2                                                                     |  |
|  | SLC36A3;SLC36A3                                                             |  |

|  |                                 |  |
|--|---------------------------------|--|
|  | SLC38A10;SLC38A10               |  |
|  | SLC38A6                         |  |
|  | SLC43A2                         |  |
|  | SLC45A2;SLC45A2                 |  |
|  | SLC4A10                         |  |
|  | SLC4A4;SLC4A4                   |  |
|  | SLC4A8;SLC4A8                   |  |
|  | SLC5A12                         |  |
|  | SLC5A12;SLC5A12                 |  |
|  | SLC5A9;SLC5A9                   |  |
|  | SLC6A12;SLC6A12;SLC6A12         |  |
|  | SLC6A14                         |  |
|  | SLC6A17                         |  |
|  | SLC6A20;SLC6A20                 |  |
|  | SLC6A4                          |  |
|  | SLC6A5                          |  |
|  | SLC6A7                          |  |
|  | SLC7A11                         |  |
|  | SLC7A4                          |  |
|  | SLC7A8;SLC7A8                   |  |
|  | SLC8A1;SLC8A1;SLC8A1;SLC8A1     |  |
|  | SLC8A2                          |  |
|  | SLC9A2                          |  |
|  | SLC9A3                          |  |
|  | SLC9A9                          |  |
|  | SLCO2A1                         |  |
|  | SLCO5A1;SLCO5A1;SLCO5A1;SLCO5A1 |  |
|  | SLIT3                           |  |
|  | SLITRK1;SLITRK1                 |  |
|  | SLITRK3                         |  |
|  | SLITRK5                         |  |
|  | SMAD9;SMAD9                     |  |
|  | SMARCA1;SMARCA1                 |  |
|  | SMC1B                           |  |
|  | SMEK3P                          |  |
|  | SMOC2;SMOC2                     |  |
|  | SMPDL3A                         |  |
|  | SMPX                            |  |
|  | SMPX;SMPX                       |  |
|  | SMYD3;SMYD3                     |  |
|  | SNAP91;SNAP91                   |  |
|  | SNCAIP                          |  |
|  | SND1                            |  |
|  | SNED1                           |  |
|  | SNHG6                           |  |
|  | SNORD113-6                      |  |
|  | SNORD114-29                     |  |



|  |                                                         |  |
|--|---------------------------------------------------------|--|
|  | SNRPN;SNRPN;SNRPN                                       |  |
|  | SNTG2                                                   |  |
|  | SNX20;SNX20                                             |  |
|  | SOAT2                                                   |  |
|  | SOHLH2                                                  |  |
|  | SORBS1;SORBS1;SORBS1;SORBS1;SORBS1;SORBS1;SORBS1        |  |
|  | SORBS2;SORBS2;SORBS2;SORBS2;SORBS2;SORBS2               |  |
|  | SORBS2;SORBS2;SORBS2;SORBS2;SORBS2;SORBS2;SORBS2;SORBS2 |  |
|  | SORCS1;SORCS1                                           |  |
|  | SORCS2                                                  |  |
|  | SOX11;SOX11                                             |  |
|  | SOX14                                                   |  |
|  | SOX17                                                   |  |
|  | SOX20T                                                  |  |
|  | SOX5                                                    |  |
|  | SOX5;SOX5                                               |  |
|  | SOX5;SOX5;SOX5                                          |  |
|  | SPATC1;SPATC1                                           |  |
|  | SPDYE4                                                  |  |
|  | SPEM1;NLGN2                                             |  |
|  | SPHKAP;SPHKAP                                           |  |
|  | SPIC                                                    |  |
|  | SPINK1                                                  |  |
|  | SPINK5;SPINK5;SPINK5                                    |  |
|  | SPOCK2                                                  |  |
|  | SPOCK2;SPOCK2                                           |  |
|  | SPOCK3;SPOCK3                                           |  |
|  | SPON1                                                   |  |
|  | SPRR2C                                                  |  |
|  | SPRR2G                                                  |  |
|  | SRCIN1                                                  |  |
|  | SRMS                                                    |  |
|  | SSC5D                                                   |  |
|  | SST                                                     |  |
|  | SSTR1                                                   |  |
|  | ST18                                                    |  |
|  | ST6GAL2;ST6GAL2;ST6GAL2                                 |  |
|  | ST6GALNAC3                                              |  |
|  | ST6GALNAC3;ST6GALNAC3                                   |  |
|  | ST6GALNAC5                                              |  |
|  | ST8SIA4;ST8SIA4                                         |  |
|  | STAB2                                                   |  |
|  | STAM                                                    |  |
|  | STARD8;STARD8                                           |  |
|  | STAT4                                                   |  |
|  | STAT5B                                                  |  |

|  |                                     |  |
|--|-------------------------------------|--|
|  | STATH;STATH                         |  |
|  | STEAP4                              |  |
|  | STK10                               |  |
|  | STK31;STK31;STK31                   |  |
|  | STK32B                              |  |
|  | STK32C                              |  |
|  | STMN2                               |  |
|  | STS;STS                             |  |
|  | STX4                                |  |
|  | STXBP5L                             |  |
|  | STXBP5L;STXBP5L                     |  |
|  | STXBP6                              |  |
|  | SULF1;SULF1;SULF1;SULF1             |  |
|  | SULT1E1                             |  |
|  | SUSD2                               |  |
|  | SUSD4;SUSD4                         |  |
|  | SUV420H1;SUV420H1                   |  |
|  | SV2B;SV2B                           |  |
|  | SV2C                                |  |
|  | SVOPL;SVOPL                         |  |
|  | SYCE1;SYCE1                         |  |
|  | SYCE1;SYCE1;SYCE1                   |  |
|  | SYCP2L                              |  |
|  | SYN3                                |  |
|  | SYNE1;SYNE1;SYNE1;SYNE1             |  |
|  | SYNE2;SYNE2                         |  |
|  | SYNGAP1                             |  |
|  | SYNM;SYNM                           |  |
|  | SYNPO2;SYNPO2;SYNPO2                |  |
|  | SYNPO;SYNPO                         |  |
|  | SYPL2                               |  |
|  | SYT14;SYT14;SYT14;SYT14;SYT14;SYT14 |  |
|  | SYT7                                |  |
|  | SYT9                                |  |
|  | T                                   |  |
|  | TAAR2                               |  |
|  | TAAR5                               |  |
|  | TAC1;TAC1;TAC1;TAC1                 |  |
|  | TACC1                               |  |
|  | TACC1;TACC1                         |  |
|  | TACC1;TACC1;TACC1                   |  |
|  | TACC2;TACC2;TACC2;TACC2             |  |
|  | TAF10                               |  |
|  | TAPT1                               |  |
|  | TARM1                               |  |
|  | TAS2R38                             |  |
|  | TAS2R40                             |  |

|                                    |  |
|------------------------------------|--|
| TAS2R60                            |  |
| TBC1D16                            |  |
| TBC1D1;PTTG2                       |  |
| TBC1D3C                            |  |
| TBC1D4                             |  |
| TBC1D9                             |  |
| TBCD                               |  |
| TBCE;TBCE                          |  |
| TBPL2                              |  |
| TBX5;TBX5;TBX5;TBX5                |  |
| TBXAS1;TBXAS1;TBXAS1;TBXAS1;TBXAS1 |  |
| TCEAL8;TCEAL8                      |  |
| TCERG1L                            |  |
| TCL1A;TCL1A                        |  |
| TCP11L1;TCP11L1                    |  |
| TCTE1                              |  |
| TCTEX1D1                           |  |
| TDH                                |  |
| TDRD5                              |  |
| TECTA                              |  |
| TECTB                              |  |
| TEKT3                              |  |
| TERT;TERT                          |  |
| TESC;TESC;TESC                     |  |
| TET1                               |  |
| TEX11;TEX11                        |  |
| TEX13B;TEX13B                      |  |
| TF                                 |  |
| TFAP2B                             |  |
| TFAP2D                             |  |
| TFAP2E                             |  |
| TFCP2                              |  |
| TFF2                               |  |
| TFF3                               |  |
| TFPI2                              |  |
| TG                                 |  |
| TGM3                               |  |
| TGM5;TGM5                          |  |
| TGM6                               |  |
| THPO                               |  |
| THSD4                              |  |
| THSD7B                             |  |
| TIAM2                              |  |
| TIFAB                              |  |
| TKTL1;TEX28;TKTL1                  |  |
| TLR7                               |  |
| TLR8;LOC349408                     |  |

|  |                           |  |
|--|---------------------------|--|
|  | TLX1;TLX1NB               |  |
|  | TM7SF4                    |  |
|  | TMC1                      |  |
|  | TMC2                      |  |
|  | TMC3                      |  |
|  | TMCO7                     |  |
|  | TMED2                     |  |
|  | TMEM117                   |  |
|  | TMEM132D                  |  |
|  | TMEM150B                  |  |
|  | TMEM163                   |  |
|  | TMEM174                   |  |
|  | TMEM184A                  |  |
|  | TMEM200C                  |  |
|  | TMEM211                   |  |
|  | TMEM213;ATP6V0A4;ATP6V0A4 |  |
|  | TMEM215;TMEM215           |  |
|  | TMEM225                   |  |
|  | TMEM229A                  |  |
|  | TMEM26                    |  |
|  | TMEM35                    |  |
|  | TMEM39B                   |  |
|  | TMEM47                    |  |
|  | TMEM72                    |  |
|  | TMEM90B                   |  |
|  | TMLHE                     |  |
|  | TMSB15B;MIR1256           |  |
|  | TMTC1                     |  |
|  | TNF                       |  |
|  | TNFAIP8L3                 |  |
|  | TNFRSF8                   |  |
|  | TNFSF11                   |  |
|  | TNN                       |  |
|  | TNP2                      |  |
|  | TNR                       |  |
|  | TNR;TNR                   |  |
|  | TNRC18                    |  |
|  | TNS1                      |  |
|  | TNS3                      |  |
|  | TNXB                      |  |
|  | TNXB;TNXB                 |  |
|  | TOX                       |  |
|  | TOX3                      |  |
|  | TOX3;TOX3                 |  |
|  | TPH2                      |  |
|  | TPK1;TPK1                 |  |
|  | TPO;TPO;TPO;TPO           |  |

|  |                                                                                                                                                                                                                                     |  |
|--|-------------------------------------------------------------------------------------------------------------------------------------------------------------------------------------------------------------------------------------|--|
|  | TPRA1;TPRA1;TPRA1;TPRA1                                                                                                                                                                                                             |  |
|  | TPTE;TPTE;TPTE;TPTE;TPTE                                                                                                                                                                                                            |  |
|  | TRAF1                                                                                                                                                                                                                               |  |
|  | TRAF3IP2;TRAF3IP2;TRAF3IP2;TRAF3IP2;TRAF3IP2                                                                                                                                                                                        |  |
|  | TRANK1                                                                                                                                                                                                                              |  |
|  | TRAPPC9;TRAPPC9                                                                                                                                                                                                                     |  |
|  | TRAT1                                                                                                                                                                                                                               |  |
|  | TRHDE                                                                                                                                                                                                                               |  |
|  | TRHR                                                                                                                                                                                                                                |  |
|  | TRIM10;TRIM10                                                                                                                                                                                                                       |  |
|  | TRIM15                                                                                                                                                                                                                              |  |
|  | TRIM26                                                                                                                                                                                                                              |  |
|  | TRIM27                                                                                                                                                                                                                              |  |
|  | TRIM31                                                                                                                                                                                                                              |  |
|  | TRIM34;TRIM34;TRIM34;TRIM6-TRIM34;TRIM78P                                                                                                                                                                                           |  |
|  | TRIM36;TRIM36;TRIM36;TRIM36;TRIM36;TRIM36                                                                                                                                                                                           |  |
|  | TRIM39;TRIM39                                                                                                                                                                                                                       |  |
|  | TRIM40                                                                                                                                                                                                                              |  |
|  | TRIM40;TRIM40                                                                                                                                                                                                                       |  |
|  | TRIM42;TRIM42                                                                                                                                                                                                                       |  |
|  | TRIM48                                                                                                                                                                                                                              |  |
|  | TRIM58                                                                                                                                                                                                                              |  |
|  | TRIM6-TRIM34;TRIM6;TRIM6-TRIM34;TRIM6;TRIM6                                                                                                                                                                                         |  |
|  | TRIM61                                                                                                                                                                                                                              |  |
|  | TRIM63;TRIM63                                                                                                                                                                                                                       |  |
|  | TRIM71                                                                                                                                                                                                                              |  |
|  | TRIM9                                                                                                                                                                                                                               |  |
|  | TRIM9;TRIM9                                                                                                                                                                                                                         |  |
|  | TRIO                                                                                                                                                                                                                                |  |
|  | TRPC4;TRPC4;TRPC4;TRPC4;TRPC4;TRPC4                                                                                                                                                                                                 |  |
|  | TRPC6                                                                                                                                                                                                                               |  |
|  | TRPC7;TRPC7;TRPC7                                                                                                                                                                                                                   |  |
|  | TRPM1                                                                                                                                                                                                                               |  |
|  | TRPM2                                                                                                                                                                                                                               |  |
|  | TRPM5                                                                                                                                                                                                                               |  |
|  | TRPV5;TRPV5                                                                                                                                                                                                                         |  |
|  | TSHR                                                                                                                                                                                                                                |  |
|  | TSLP                                                                                                                                                                                                                                |  |
|  | TSNARE1                                                                                                                                                                                                                             |  |
|  | TSNAX-DISC1;DISC1;DISC1;DISC1;DISC1;TSNAX-DISC1;DISC1;DISC1;TSNAX-DISC1;DISC1;TSNAX-DISC1;DISC1;DISC1;TSNAX-DISC1;DISC1;DISC1;DISC1;DISC1;DISC1;DISC1;DISC1;TSNAX-DISC1;TSNAX-DISC1;DISC1;DISC1;DISC1;DISC1;TSNAX-DISC1;DISC1;DISC1 |  |

|  |                                                                                                                                                                                                                               |  |
|--|-------------------------------------------------------------------------------------------------------------------------------------------------------------------------------------------------------------------------------|--|
|  | TSNAX-DISC1;DISC1;DISC1;DISC1;TSNAX-DISC1;DISC1;DISC1;DISC1;DISC1;TSNAX-DISC1;DISC1;DISC1;TSNAX-DISC1;DISC1;TSNAX-DISC1;DISC1;DISC1;DISC1;DISC1;DISC1;TSNAX-DISC1;DISC1;DISC1;DISC1;DISC1;DISC1;TSNAX-DISC1;DISC1;DISC1;DISC1 |  |
|  | TSPAN7                                                                                                                                                                                                                        |  |
|  | TSPO2;TSPO2                                                                                                                                                                                                                   |  |
|  | TTC12                                                                                                                                                                                                                         |  |
|  | TTC24                                                                                                                                                                                                                         |  |
|  | TTC25                                                                                                                                                                                                                         |  |
|  | TTC28                                                                                                                                                                                                                         |  |
|  | TLL5                                                                                                                                                                                                                          |  |
|  | TTN;TTN;TTN;TTN;TTN;TTN;TTN;TTN;TTN;TTN                                                                                                                                                                                       |  |
|  | TTPA                                                                                                                                                                                                                          |  |
|  | TTPAL;TTPAL                                                                                                                                                                                                                   |  |
|  | TTR                                                                                                                                                                                                                           |  |
|  | TTYH3                                                                                                                                                                                                                         |  |
|  | TUBB8;TUBB8                                                                                                                                                                                                                   |  |
|  | TWSG1                                                                                                                                                                                                                         |  |
|  | UBE2D4;POLR2J4                                                                                                                                                                                                                |  |
|  | UBE2E3;UBE2E3                                                                                                                                                                                                                 |  |
|  | UBE3B;UBE3B                                                                                                                                                                                                                   |  |
|  | UBL4B                                                                                                                                                                                                                         |  |
|  | UCP1                                                                                                                                                                                                                          |  |
|  | UGT3A2;UGT3A2;UGT3A2                                                                                                                                                                                                          |  |
|  | ULBP2                                                                                                                                                                                                                         |  |
|  | ULK4                                                                                                                                                                                                                          |  |
|  | UNC13A                                                                                                                                                                                                                        |  |
|  | UNC13C                                                                                                                                                                                                                        |  |
|  | UNC5A                                                                                                                                                                                                                         |  |
|  | UNC5D                                                                                                                                                                                                                         |  |
|  | UNCX                                                                                                                                                                                                                          |  |
|  | UNKL                                                                                                                                                                                                                          |  |
|  | UPK1B                                                                                                                                                                                                                         |  |
|  | UPRT;UPRT                                                                                                                                                                                                                     |  |
|  | USH1C;USH1C                                                                                                                                                                                                                   |  |
|  | USH2A;USH2A                                                                                                                                                                                                                   |  |
|  | USP29                                                                                                                                                                                                                         |  |
|  | USP44                                                                                                                                                                                                                         |  |
|  | UST                                                                                                                                                                                                                           |  |
|  | UTP11L                                                                                                                                                                                                                        |  |
|  | UTRN                                                                                                                                                                                                                          |  |
|  | VAMP3                                                                                                                                                                                                                         |  |
|  | VARS2;VARS2;VARS2                                                                                                                                                                                                             |  |
|  | VASH1                                                                                                                                                                                                                         |  |
|  | VAX1;VAX1                                                                                                                                                                                                                     |  |

|  |                               |  |
|--|-------------------------------|--|
|  | VCAM1;VCAM1                   |  |
|  | VGLL1;MIR934                  |  |
|  | VIPR2                         |  |
|  | VPS16;FAM113A;VPS16           |  |
|  | VPS52                         |  |
|  | VSIG1;VSIG1                   |  |
|  | VSTM2A                        |  |
|  | VSTM2A;VSTM2A                 |  |
|  | VSTM2L                        |  |
|  | VWA3B                         |  |
|  | VWC2                          |  |
|  | WARS2;WARS2                   |  |
|  | WBP11P1                       |  |
|  | WBP2NL                        |  |
|  | WDFY1                         |  |
|  | WDFY4                         |  |
|  | WDR26;WDR26                   |  |
|  | WDR60                         |  |
|  | WDR75                         |  |
|  | WDR76;WDR76                   |  |
|  | WDR81;WDR81;WDR81;WDR81       |  |
|  | WDR86                         |  |
|  | WDR88                         |  |
|  | WFDC11                        |  |
|  | WFDC8;WFDC8                   |  |
|  | WFIKKN2                       |  |
|  | WFS1;WFS1                     |  |
|  | WIF1                          |  |
|  | WIPF1;WIPF1                   |  |
|  | WIPF3                         |  |
|  | WIPI2;WIPI2;WIPI2;WIPI2;WIPI2 |  |
|  | WNT1                          |  |
|  | WNT3                          |  |
|  | WNT5A                         |  |
|  | WNT5B;WNT5B                   |  |
|  | WNT8A;WNT8A                   |  |
|  | WT1;WT1;WT1;WT1               |  |
|  | WWC2                          |  |
|  | WWOX                          |  |
|  | WWP2;WWP2                     |  |
|  | XAF1;XAF1;XAF1;XAF1           |  |
|  | XCR1;XCR1                     |  |
|  | XIRP1                         |  |
|  | XKR4;SBF1P1                   |  |
|  | YAF2                          |  |
|  | YBX2                          |  |
|  | YY2;MBTPS2                    |  |

|                             |  |
|-----------------------------|--|
| ZAP70;ZAP70                 |  |
| ZAR1L                       |  |
| ZBBX                        |  |
| ZBTB22;ZBTB22               |  |
| ZBTB47                      |  |
| ZCCHC13                     |  |
| ZCCHC16                     |  |
| ZCCHC24                     |  |
| ZCCHC5                      |  |
| ZDHHC2                      |  |
| ZEB1;ZEB1;ZEB1;ZEB1;ZEB1    |  |
| ZEB2;ZEB2                   |  |
| ZFHX4                       |  |
| ZFPM2                       |  |
| ZFYVE28                     |  |
| ZIC3                        |  |
| ZIK1                        |  |
| ZMAT1                       |  |
| ZMAT4;ZMAT4                 |  |
| ZNF117                      |  |
| ZNF177;ZNF177               |  |
| ZNF185                      |  |
| ZNF211;ZNF211               |  |
| ZNF239;ZNF239;ZNF239        |  |
| ZNF253                      |  |
| ZNF264                      |  |
| ZNF266;ZNF266               |  |
| ZNF280C                     |  |
| ZNF302;ZNF302               |  |
| ZNF311                      |  |
| ZNF323;ZKSCAN3;ZNF323       |  |
| ZNF324B                     |  |
| ZNF32;ZNF32                 |  |
| ZNF346                      |  |
| ZNF362                      |  |
| ZNF385B;MIR1258             |  |
| ZNF385B;ZNF385B             |  |
| ZNF385B;ZNF385B;ZNF385B     |  |
| ZNF397OS;ZNF397OS           |  |
| ZNF415;ZNF415;ZNF415;ZNF415 |  |
| ZNF423                      |  |
| ZNF446                      |  |
| ZNF45                       |  |
| ZNF514;ZNF514               |  |
| ZNF521                      |  |
| ZNF530                      |  |
| ZNF540                      |  |



|  |                        |  |
|--|------------------------|--|
|  | ZNF578                 |  |
|  | ZNF583;ZNF583;ZNF583   |  |
|  | ZNF585B                |  |
|  | ZNF605;ZNF605          |  |
|  | ZNF648                 |  |
|  | ZNF662;ZNF662          |  |
|  | ZNF677                 |  |
|  | ZNF705A                |  |
|  | ZNF705D;FAM66D         |  |
|  | ZNF709                 |  |
|  | ZNF713                 |  |
|  | ZNF76                  |  |
|  | ZNF775                 |  |
|  | ZNF804A                |  |
|  | ZNF804B                |  |
|  | ZNF804B;ZNF804B        |  |
|  | ZNF862                 |  |
|  | ZNRD1;ZNRD1;NCRNA00171 |  |
|  | ZNRF2                  |  |
|  | ZPBP;ZPBP              |  |
|  | ZSCAN18;ZSCAN18        |  |
|  | ZSCAN5B                |  |
